# Supplementary material for: GWAS and Meta-QTL Analysis of Yield-Related Ear Traits in Maize
Source: Plants (Basel). 2023 Nov 8;12(22):3806. doi: 10.3390/plants12223806 (PMC10674677; doi:10.3390/plants12223806)
Supplement: Supplementary file 1 [file plants-12-03806-s001.zip › Supplementary Table.xlsx]

## Sheet: Table S1
Table S1 Descriptive statistics of ear traits
Trait	Year	Range	Mean	SD	CV(%)	Skewness	Kurtosis
ERN	2019	9.42~19.25	14.09	1.73	12.3	0.23	-0.14
	2020	8.50~20.00	14.27	1.78	12.44	-0.02	-0.09
	2021	9.50~19.75	14.56	1.86	12.8	0.04	-0.33
	BLUE	9.28~19.77	14.28	1.66	11.63	0.08	0.02
KNR	2019	10.50~37.17	23.96	4.69	19.57	-0.06	-0.25
	2020	12.63~37.75	24.95	4.47	17.93	-0.04	-0.01
	2021	11.75~37.25	24.97	4.8	19.22	0.06	-0.22
	BLUE	13.39~34.59	24.52	3.95	16.11	-0.06	-0.32
CD(cm)	2019	1.91~3.38	2.6	0.24	9.16	0.2	0.01
	2020	2.13~3.38	2.66	0.23	8.54	0.43	0.01
	2021	1.96~3.44	2.68	0.26	9.68	0.34	0.02
	BLUE	1.95~3.27	2.64	0.22	8.45	0.2	-0.07
ED(cm)	2019	2.63~4.92	3.8	0.38	10.08	-0.09	0
	2020	2.81~5.06	4	0.4	9.94	-0.12	-0.09
	2021	2.69~5.38	4.06	0.44	10.91	-0.09	0.09
	BLUE	2.67~4.95	3.94	0.37	9.4	-0.26	0.21
EL(cm)	2019	7.96~19.17	13.49	1.97	14.58	0.06	-0.04
	2020	9.00~19.69	14.48	1.93	13.31	-0.02	-0.08
	2021	8.75~20.13	14.7	2.06	14.01	0.14	-0.39
	BLUE	9.20~19.16	14.22	1.71	12.06	0.04	0.06
EW(g)	2019	37.51~156.97	90.23	23.34	25.86	0.24	-0.42
	2020	39.91~194.58	108.4	28.95	26.71	0.26	-0.04
	2021	38.88~198.86	111.98	29.39	26.24	0.19	-0.3
	BLUE	30.59~178.83	102.56	24.59	23.98	0.05	-0.09
HKW(g)	2019	13.97~39.65	27.09	4.79	17.7	-0.12	-0.38
	2020	14.15~43.84	28.99	4.93	17	-0.32	0.02
	2021	16.19~41.51	29.17	4.41	15.13	-0.21	-0.01
	BLUE	14.94~42.18	28.35	4.44	15.67	-0.17	0.04
VW(g/l)	2020	702.13~833.99	776.58	25.3	3.26	-0.23	-0.3
	2021	680.25~849.98	769.76	29.11	3.78	-0.1	-0.15
	BLUE	698.19~835.90	771.66	24.99	3.24	-0.17	-0.1

## Sheet: Table S2
Table S2 Correlation analysis of ear traits
Year	Trait	ERN	KNR	EL	ED	EW	CD	HKW
2019	KNR	0.33***
	EL	0.11**	0.66***
	ED	0.63***	0.42***	0.28***
	EW	0.40***	0.66***	0.61***	0.68***
	CD	0.49***	0.12	0.14**	0.68***	0.27***
	HKW	-0.11*	-0.01	0.31***	0.42***	0.48***	0.17***
2020	KNR	0.21***
	EL	0	0.72***
	ED	0.62***	0.28***	0.17***
	EW	0.45***	0.66***	0.60***	0.72***
	CD	0.45***	0.06	0.1*	0.72***	0.42***
	HKW	-0.07	0.03	0.22***	0.50***	0.46***	0.32***
	VW	-0.03	0.12**	0.11*	-0.14**	0.09*	-0.14**	0.04
2021	KNR	0.3***
	EL	0.10*	0.69***
	ED	0.65***	0.39***	0.25***
	EW	0.5***	0.67***	0.57***	0.76***
	CD	0.47***	0.12**	0.21***	0.72***	0.46***
	HKW	-0.07	0.03	0.22***	0.45***	0.45***	0.24***
	VW	-0.08	0.02	0.01	-0.26***	-0.04	-0.27***	-0.06
BLUE	KNR	0.29***
	EL	0.04	0.69***
	ED	0.67***	0.37***	0.22***
	EW	0.51***	0.68***	0.60***	0.78***
	CD	0.51***	0.11*	0.15***	0.76***	0.47***
	HKW	-0.06	0.02	0.25***	0.51***	0.53***	0.3***
	VW	-0.01	0.09*	0.04	-0.19***	0.01	-0.19***	-0.07
*, ** and *** indicates the significant levels at p < 0.05, 0.01 and 0.001, respectively.

## Sheet: Table S3
Table S3 Significant SNP for ear traits
Trait	Year	SNPs	Chromosome	Position	P.value	MAF
ERN	2019	8_113534052	8	113534052	8.33609e-09	0.231482
ERN	2019	6_57924193	6	57924193	5.80079e-07	0.377778
ERN	2019	5_212791755	5	212791755	8.21059e-07	0.357407
ERN	2019	4_235942226	4	235942226	1.04015e-06	0.474074
ED	2019	8_9328220	8	9328220	2.64294e-07	0.222325
EW	2019	6_88904986	6	88904986	7.14821e-08	0.483213
EW	2019	1_69925817	1	69925817	2.57324e-07	0.479616
CD	2019	7_172542282	7	172542282	1.64932e-06	0.357006
ERN	2020	7_109278626	7	109278626	4.68308e-08	0.472072
ERN	2020	5_212791755	5	212791755	2.03865e-07	0.355856
ERN	2020	6_39092003	6	39092003	2.23096e-07	0.33964
ERN	2020	3_194720972	3	194720972	5.10584e-07	0.454955
ERN	2020	1_3069018	1	3069018	9.69319e-07	0.344144
ERN	2020	7_168636506	7	168636506	1.21795e-06	0.41982
ERN	2020	9_139153677	9	139153677	1.4661e-06	0.5
KNR	2020	8_2837412	8	2837412	9.7758e-10	0.33842
KNR	2020	9_93664580	9	93664580	7.32968e-08	0.303411
KNR	2020	3_170743474	3	170743474	1.31489e-06	0.428187
KNR	2020	2_5927707	2	5927707	1.38715e-06	0.48833
EL	2020	5_196595152	5	196595152	7.67277e-10	0.343581
EL	2020	3_190518593	3	190518593	8.82209e-09	0.460217
EL	2020	9_62082638	9	62082638	8.23528e-07	0.492767
ED	2020	3_194720972	3	194720972	1.87704e-09	0.451526
ED	2020	3_218404753	3	218404753	1.22654e-08	0.409336
ED	2020	7_7721860	7	7721860	3.0605e-07	0.431777
ED	2020	2_155886844	2	155886844	7.6897e-07	0.40754
CD	2020	2_17540270	2	17540270	1.58775e-11	0.351852
CD	2020	5_207792359	5	207792359	1.71982e-10	0.341667
EW	2020	10_141046288	10	141046288	2.54545e-09	0.356089
EW	2020	6_145827904	6	145827904	4.40412e-08	0.374539
EW	2020	4_6097039	4	6097039	3.53853e-07	0.439114
EW	2020	7_142819675	7	142819675	8.63544e-07	0.440037
EW	2020	1_275774692	1	275774692	8.95313e-07	0.292435
EW	2020	3_194720972	3	194720972	1.36783e-06	0.457565
HKW	2020	8_152233485	8	152233485	2.22163e-09	0.181569
HKW	2020	4_211335022	4	211335022	2.51426e-08	0.367701
HKW	2020	4_747779	4	747779	7.50512e-08	0.433394
HKW	2020	5_156389697	5	156389697	1.8665e-07	0.490876
HKW	2020	1_7402953	1	7402953	6.65087e-07	0.418796
HKW	2020	2_22819914	2	22819914	7.44928e-07	0.21989
HKW	2020	7_167771765	7	167771765	8.25064e-07	0.432482
VW	2020	5_214426910	5	214426910	4.62314e-05	0.410714
VW	2020	4_153067390	4	153067390	8.34266e-05	0.334587
ERN	2021	3_218404753	3	218404753	9.63863e-11	0.412916
ERN	2021	2_211102024	2	211102024	6.833e-08	0.415851
ERN	2021	4_232498484	4	232498484	2.99312e-07	0.309198
ERN	2021	1_300698147	1	300698147	6.7861e-07	0.342466
EL	2021	1_291031689	1	291031689	9.55618e-16	0.492111
EL	2021	5_82269768	5	82269768	1.03922e-12	0.376726
EL	2021	6_105377877	6	105377877	8.43658e-10	0.316568
EL	2021	9_112907279	9	112907279	5.16179e-08	0.131164
ED	2021	5_53477054	5	53477054	2.45324e-08	0.287671
ED	2021	5_5898430	5	5898430	7.53597e-08	0.450098
ED	2021	10_6669400	10	6669400	2.01856e-07	0.201566
CD	2021	1_35937595	1	35937595	8.9175e-07	0.382892
EW	2021	9_98977438	9	98977438	4.33948e-08	0.455578
EW	2021	1_70066309	1	70066309	1.42516e-07	0.393595
EW	2021	9_140213959	9	140213959	1.67972e-07	0.285124
EW	2021	10_19642234	10	19642234	3.40025e-07	0.373967
EW	2021	4_2945193	4	2945193	3.87055e-07	0.335744
EW	2021	5_30642555	5	30642555	4.40344e-07	0.350207
EW	2021	5_188664468	5	188664468	7.39953e-07	0.373967
HKW	2021	9_115589979	9	115589979	1.35765e-11	0.42004
HKW	2021	2_195766004	2	195766004	9.1257e-11	0.160931
HKW	2021	8_104661839	8	104661839	5.80733e-10	0.491903
HKW	2021	1_80777197	1	80777197	8.57894e-09	0.145749
HKW	2021	10_144631461	10	144631461	2.28056e-08	0.378543
HKW	2021	1_274799763	1	274799763	5.05404e-08	0.452429
HKW	2021	9_75603144	9	75603144	1.30696e-07	0.336032
HKW	2021	8_105464285	8	105464285	2.89434e-07	0.494939
HKW	2021	8_279559	8	279559	8.10518e-07	0.364372
HKW	2021	5_151923098	5	151923098	1.1269e-06	0.242915
VW	2021	5_212917572	5	212917572	4.61337e-05	0.48081
VW	2021	3_160707766	3	160707766	9.18073e-05	0.416844
ERN	BLUE	2_54919396	2	54919396	3.94248e-09	0.422414
ERN	BLUE	7_168679099	7	168679099	6.78771e-09	0.489655
ERN	BLUE	1_3069018	1	3069018	1.1041e-06	0.346552
ERN	BLUE	8_130711506	8	130711506	1.52403e-06	0.431897
KNR	BLUE	2_80118146	2	80118146	9.10461e-10	0.231897
KNR	BLUE	3_187959017	3	187959017	9.91063e-08	0.19569
ED	BLUE	1_67406583	1	67406583	9.22361e-08	0.251724
ED	BLUE	5_5898430	5	5898430	5.06882e-07	0.443966
ED	BLUE	7_168679099	7	168679099	9.13501e-07	0.489655
CD	BLUE	1_293704709	1	293704709	1.57727e-08	0.335345
CD	BLUE	3_214834896	3	214834896	1.89545e-07	0.361207
CD	BLUE	1_12992633	1	12992633	2.75394e-07	0.185345
CD	BLUE	9_11709933	9	11709933	7.75582e-07	0.47931
CD	BLUE	5_193598872	5	193598872	8.19703e-07	0.362069
CD	BLUE	6_129843936	6	129843936	1.01911e-06	0.349138
CD	BLUE	2_127229418	2	127229418	1.56236e-06	0.157759
EW	BLUE	3_13547914	3	13547914	2.16728e-08	0.42931
EW	BLUE	6_69853273	6	69853273	4.00186e-07	0.290517
EW	BLUE	6_88904986	6	88904986	5.03013e-07	0.489655
EW	BLUE	9_140213959	9	140213959	6.97855e-07	0.305172
EW	BLUE	9_75603144	9	75603144	8.09754e-07	0.327586
EW	BLUE	4_53473704	4	53473704	8.99532e-07	0.334483
EW	BLUE	4_224609266	4	224609266	1.23553e-06	0.425
HKW	BLUE	8_148580499	8	148580499	2.05642e-09	0.375862
HKW	BLUE	2_223835771	2	223835771	9.3169e-07	0.218966
HKW	BLUE	2_196947288	2	196947288	1.02725e-06	0.285345
HKW	BLUE	3_164433230	3	164433230	1.47739e-06	0.19569
VW	BLUE	10_141758136	10	141758136	8.88104e-05	0.493966
VW	BLUE	10_123896073	10	123896073	9.30527e-05	0.259483
VW	BLUE	3_160707766	3	160707766	9.43961e-05	0.419828

## Sheet: Table S4
Table S4 Co-location of SNP interval candidate genes
Trait	SNP	Chr	Position	Gene
ERN	1_3069018	1	3069018	Zm00001d027321 Zm00001d027340 Zm00001d027319 Zm00001d027322 Zm00001d027323 Zm00001d027324 Zm00001d027325 Zm00001d027326 Zm00001d027327 Zm00001d027328 Zm00001d027329 Zm00001d027330 Zm00001d027331 Zm00001d027332 Zm00001d027333 Zm00001d027334 Zm00001d027335 Zm00001d027336 Zm00001d027337 Zm00001d027338 Zm00001d027339
ERN	5_212791755	5	212791755	Zm00001d018036 Zm00001d001737 NIP2-1 Zm00001d018038 Zm00001d018039 Zm00001d018040 Zm00001d018041 Zm00001d018042 Zm00001d018043 Zm00001d018044 Zm00001d018045 Zm00001d018046 Zm00001d018047 Zm00001d018048
ERN、ED	3_194720972	3	194720972	Zm00001d043288 Zm00001d043289 Zm00001d043290 Zm00001d043291 Zm00001d043292 Zm00001d000678 Zm00001d043293 Zm00001d043294 Zm00001d043295
ERN、ED	3_218404753	3	218404753	Zm00001d044060 Zm00001d044061 Zm00001d044062 Zm00001d044063 Zm00001d044064 Zm00001d044065 Zm00001d044066 Zm00001d044067 Zm00001d044068 Zm00001d044069 Zm00001d044070 Zm00001d044071 Zm00001d044072 Zm00001d044073 Zm00001d044074 Zm00001d044075 Zm00001d044076 Zm00001d044078 Zm00001d044079 Zm00001d044080 Zm00001d044081 Zm00001d000706 Zm00001d044082 Zm00001d044083 Zm00001d044084 Zm00001d044085
ERN、ED	7_168679099	7	168679099	TIF5A Zm00001d022043 Zm00001d022044 Zm00001d022045 Zm00001d022046 Zm00001d022047 Zm00001d022048 Zm00001d022049
ED	5_5898430	5	5898430	Zm00001d013165 Zm00001d013166 Zm00001d013167 Zm00001d013168 Zm00001d013169 Zm00001d013170 Zm00001d013171 Zm00001d013172 Zm00001d013173 Zm00001d013174 Zm00001d013175 Zm00001d013176 Zm00001d013177 Zm00001d013178 Zm00001d013179 Zm00001d013180 Zm00001d013181 Zm00001d013182 Zm00001d013183 Zm00001d013184 Zm00001d013185 Zm00001d013186 Zm00001d013187
EW	6_88904986	6	88904986	Zm00001d036442 Zm00001d036443 Zm00001d036444 Zm00001d036445 Zm00001d036446 Zm00001d036447 Zm00001d036448 Zm00001d036449 Zm00001d036450 Zm00001d036451 Zm00001d036452 Zm00001d036453 Zm00001d036454 Zm00001d036455
EW	9_140213959	9	140213959	Zm00001d047723 Zm00001d047724 Zm00001d047725 Zm00001d047726 Zm00001d047727 Zm00001d047728 Zm00001d047729 Zm00001d047730 Zm00001d047731 Zm00001d027192 Zm00001d047732 Zm00001d047733 Zm00001d047734 Zm00001d047735 Zm00001d047736 Zm00001d047737 Zm00001d047738 Zm00001d047739 Zm00001d047740
EW、HKW	9_75603144	9	75603144	NO
VW	3_160707766	3	160707766	Zm00001d042314 Zm00001d042315 Zm00001d042316 Zm00001d042317 Zm00001d042318

## Sheet: Table S5
Table S5 Gene expression of candidate genes related to traits in different tissues in public database
Candidate gene	16DAP_Embryo	18DAP_Embryo	20DAP_Embryo	22DAP_Embryo	24DAP_Embryo	16DAP_Endosperm	18DAP_Endosperm	20DAP_Endosperm	22DAP_Endosperm	24DAP_Endosperm	2DAP_Whole seed	4DAP_Whole Seed	6DAP_Whole seed	8DAP_Whole seed	10DAP_Whole seed	12DAP_Whole seed	14DAP_Whole seed	18DAP_Whole Seed	20DAP_Whole Seed	22DAP_Whole Seed	24DAP_Whole Seed	V18_Immature cob	R1_Anthers	R1_Pre pollination cob	R1_Silks	2-4mm_ear primordium	6-8mm_ear primordium
Zm00001d027319	9.3	16.5	13.1	11.1	10	4.1	5	6	6.2	6.2	6.3	5.5	4.8	5.6	4.6	4.9	4.7	4.8	6	4.9	5	6.5	1.7	5.5	4.8	10.2	9.4
Zm00001d027320	1	1.1	1.2	1.1	1.4	1.1	0.8	0.7	0.5	0.6	2	2.1	0.9	1.1	0.5	0.5	1.3	1.1	0.7	0.6	0.7	1.2	2	3.4	1.2	2.6	2.9
Zm00001d027321	2.9	3.9	3.8	3.8	5.4	1.4	1.9	2.1	1.4	1.6	5.9	7.4	4.4	4.4	3.6	2.2	2.6	2.6	2.1	1.7	2	6.3	7.1	8.5	5.6	14.3	13.2
Zm00001d027322	0.1	0.1	0	0	0	0.1	0	0	0	0	0	0	0	0	0	0	0	0	0	0	0	0	9.4	0	0	0	0
Zm00001d027323	76.4	9	4.3	5	7.2	139.2	19.4	8.3	7	9.3	23.4	17	21.9	20.4	33	17.6	12	30.4	10.3	10.6	13.7	3.2	20.4	10.2	7.4	39.7	37.2
Zm00001d027324	16.5	18	18.5	16.8	14.9	8	9.7	6.8	6.8	6.4	18.2	17.4	10.9	14.3	14.4	16.7	15	10.4	8.4	8.5	8.7	17.2	6.3	19.7	13	15.2	14.7
Zm00001d027325	1.1	1.6	0.6	1.1	1	2.4	1.5	1.2	1.1	1.5	1.8	2.2	3	2.9	2.6	3.3	2.8	2.3	1.7	1.9	1.8	0.6	8.2	1.4	6.1	3.3	4.3
Zm00001d027326	26.9	47.7	47.2	40.6	37.4	31.1	39.2	31.6	25.7	23.3	42.1	39.6	36	36	31.8	46.4	51.1	36.4	28.1	25	23.5	52.4	14.7	43.5	23.5	106.2	97.2
Zm00001d027329	3.1	3.9	4.2	3.5	3.4	18.2	22.9	19.7	22	17.6	4.3	4.5	7.3	6.2	8.7	21.7	23.5	20	17.8	20.5	17.4	11.8	2.4	4.7	1.8	12.4	13
Zm00001d027330	0.2	0.1	0	0	0	0.9	0.1	0.6	0.6	0.6	10.4	9.5	12.3	11.1	13.3	9.5	2.3	0.6	0.6	0.5	0.5	1.8	0.9	5.8	22.3	1.2	3.1
Zm00001d027332	0.7	0	0	0.3	0.9	0.9	1.1	0	0.2	0	0.4	0.2	1.6	1.2	4.3	1.7	3.5	4	1.1	2.6	6.2	0	2.8	0	0.5	0	0
Zm00001d027333	10	13.8	17.1	20.7	15.1	14.6	13.6	13.1	13.8	14	24.6	25.2	35.7	27.9	26.5	29.2	22.6	16.1	13	18	14.9	31.6	16.6	24.6	28	56	48.7
Zm00001d027334	4	6.2	6.4	6.4	5.8	1.7	2.3	1.9	1.8	2.8	10.5	10.8	11.2	11	12	7.4	4.7	4.6	3.4	3.6	4.5	17.9	12.2	11	6.9	27.2	28.5
Zm00001d027335	7.6	2.7	2.7	3	4.4	0.1	0	0	0	0	4.2	5.8	4.8	6.1	5	1.6	0.7	0.3	0.4	0.3	0.6	0	1.9	3.2	15.9	0	0.1
Zm00001d027337	11.8	15	15.6	15.1	6.9	1.3	2.3	1.1	1.1	1.5	9.7	6.7	4	2.9	3.4	4.9	3.4	2.7	2.3	2.7	2.2	26.8	0.2	10.4	0.5	28.1	26.9
Zm00001d027338	12.5	5.4	0.3	0.8	2	9	1.7	0.1	0.4	0.5	0.2	0	0	0	0.1	0.5	0.2	1.9	0.1	0.6	0.9	0	0	0	0	1.1	2.2
Zm00001d027339	14.9	8.7	7.4	6.2	6.5	8.3	4.9	4.6	4.3	2.7	7.3	5	6	5.6	7.8	8.4	7.3	5.1	4.6	4.6	3.7	4.2	2.4	6.1	3.1	4.7	4.9
Zm00001d027340	7.8	11.9	10.7	12.1	10.9	14.6	17	16.9	16.3	15	18.8	18.9	22.6	20.3	25	28.5	23.3	18.4	15.7	17	15.5	18.7	11.1	21	11.7	30	37.5
Zm00001d042314	5.8	5.5	6.4	5.9	8.8	4.9	2.8	5.2	4.1	6.1	10.6	14.3	12.5	13.6	12	7.7	5.5	5	5.3	5.1	5.7	5.5	75	9.8	10.4	11.8	10.4
Zm00001d042315	137.4	9.7	5.9	10.5	5.8	49	5.8	1.5	7.4	5.6	12.4	5.7	6.1	0.8	8.4	2.4	1	7	2.6	2.5	4.9	1.5	5.9	6.4	0.4	49.2	53.8
Zm00001d042317	0	0	0	0	0	0	0	0	0	0	0	0	0	0	0	0	0	0	0	0	0	0	0	0	0	0	0.4
Zm00001d043288	5.3	5.2	6.4	6.9	6.2	3.2	3.4	2.1	2.5	2.2	10.7	12.5	11.5	12.8	11.5	8.4	7.2	5.1	3.5	4.4	3.7	8.8	4.8	11.5	11.6	9.7	10.1
Zm00001d043289	4.3	6	2.4	2.4	2.5	12.2	8.1	5.5	4.4	5.6	4	3.7	8.5	6.1	9.2	10.4	6.4	6.7	5.2	4.1	4.9	3.1	19	2.8	4.4	18.6	17.4
Zm00001d043290	4.3	6	2.4	2.4	2.5	12.2	8.1	5.5	4.4	5.6	4	3.7	8.5	6.1	9.2	10.4	6.4	6.7	5.2	4.1	4.9	3.1	19	2.8	4.4	18.6	17.4
Zm00001d043291	5.1	5.9	6.4	6.9	4.6	0.3	0.4	0.2	0.1	0.1	16.6	14.2	12.5	9.6	6.3	3	1.5	1.2	1	1	0.7	8.6	2.5	11.6	5.5	29.8	33.1
Zm00001d043292	2.5	3.8	3.9	4.3	4.2	1.6	1.7	1.7	1.7	1.6	8.7	9.9	8.5	8.7	6.2	4	3.5	2.5	2.1	2.1	2.3	6.6	5.9	8.6	6.8	13.3	15
Zm00001d043293	0.2	0.3	0.1	0.1	0.2	1.4	0.4	0.5	0.9	1.2	0.6	0.4	0.6	0.7	1	0.9	0.4	0.9	0.6	0.8	0.4	0.2	1.6	0.3	3.1	1.9	3.3
Zm00001d043294	3.1	4.2	6.8	6.7	7.6	2.3	3.9	3.2	4	3.4	5	5.3	4.8	5.1	4.7	5.3	4	4.2	3.7	5	4.9	9.8	5.8	6.1	4.8	14.5	12.4
Zm00001d043295	0.5	0.8	0.9	1	0.9	0.6	1	0.8	0.8	0.6	5.4	5.9	9	9.6	8.5	4.7	2.6	2.2	2	2.1	1.7	1.4	9.7	4.9	8.8	2.3	2.6
Zm00001d044060	16.5	15.5	17.4	16.6	13.8	10	13	8.2	9.7	9.6	10.5	10.7	8	12.7	13.9	15.1	16.3	14.9	12.4	14.3	14	13.6	10.6	11.6	19.8	16.4	15.2
Zm00001d044061	1.9	0.3	0.3	0.3	0.6	1.4	0.2	0.1	0.2	0.1	0.7	0.3	0.3	0.1	0.3	0.3	0.3	0.2	0.1	0.2	0.2	0.5	0.2	0.5	0.7	2.2	2.5
Zm00001d044065	21.6	3.9	1.3	1.3	2	5.5	1.6	0.3	0.5	0.3	0.7	0.4	0.2	0.1	0.5	0.6	0.6	1.4	0.6	0.9	0.7	0.4	0.1	0.4	0	9.8	10.4
Zm00001d044068	0.4	0.1	0	0	0.1	0.7	0.1	0	0	0.1	0.3	0.1	0.2	0.2	0.4	0.4	0.7	0.6	0.4	0.5	0.6	0.2	0.6	0.1	0.1	0.9	0.9
Zm00001d044069	9.7	2.6	1.1	1.3	2.3	0	0	0	0	0	0	0.1	0	0	0	0	0.1	0.1	0.1	0.1	0.1	0.9	0	0.2	0	12.3	12.8
Zm00001d044071	2.7	1.4	1.2	1.2	1.4	2.6	0.9	1.6	1.1	1.1	2.1	1.7	1.2	2	1.3	1.5	1.7	1.8	1.4	1.2	1.4	1.9	1.1	1.9	0.5	3.5	5
Zm00001d044073	0	0.1	0	0.1	0	0.5	1	0.8	0.4	0.1	0.3	0.3	0.6	0.5	2.1	1.5	2.2	0.2	0.3	0.6	0.5	0.1	11	0.2	0	0.1	0.1
Zm00001d044074	0.1	0	0	0	0	0	0	0	0	0	0.1	0	0	0	0.2	0.1	0	0	0	0	0	0	0	0	0	0	0.1
Zm00001d044075	0	0	0	0	0	0	0	0	0	0	0	0	0	0	0	0	0	0	0	0	0	0	0	0	0	0	0
Zm00001d044076	0.1	0.1	0	0	0	0.2	0	0	0	0	1.1	0.2	0	0.1	0	0.2	0	0.6	0	0	0	0	0	0.1	0	1.9	4.1
Zm00001d044078	321.5	62.1	14.4	42.1	223.5	2.8	2.8	0	0	0	0	0	0	0	0	2	0.8	2.2	0	3	15.1	0	0	0	0.2	0.6	3
Zm00001d044079	2.6	4.1	7.4	9	9.4	0	0.2	0.2	0	0.1	6	6.2	10.6	9.2	8.8	5.8	2.7	1.1	1	1.4	1.5	6.1	1.2	5.2	7.7	9.2	9.5
Zm00001d044080	31.2	3.6	0.1	0.3	2	0.1	0.1	0	0	0	0	0	0	0	0	0	0	0.4	0	0	0.1	0	0	0	0	0	0
Zm00001d044081	1.9	1	1	0.9	1	0.1	0	0	0	0.1	0.3	0.2	0	0.1	0.1	0.1	0	0.1	0.1	0.1	0.2	2.7	0.2	0.3	0.1	10.3	6
Zm00001d044083	7.7	2.8	3.3	3.8	3.2	0.1	0	0	0	0.1	6.1	5.3	6.1	4.3	2.9	0.7	0.3	0.3	0.3	0.4	0.3	0.3	1.4	4.6	15.2	0.2	0.7
Zm00001d044084	0	0	0	0	0	0	0	0	0	0	0	0	0	0	0	0	0	0	0	0	0	0	0	0	0	0	0
Zm00001d013165	3.5	0.8	1.3	1.9	2.7	0.1	0.2	0	0.1	0	2.2	1.6	1.5	1.2	0.9	0.6	0.5	0.3	0.2	0.2	0.8	1.4	2.1	1.3	0.2	10.4	13.2
Zm00001d013166	1.9	2.4	2	1.8	0.8	0	0.1	0	0	0	1.4	0.8	0.7	0.3	0.5	0.9	0.3	0.2	0.1	0.3	0.2	2.9	0	1.5	0	12.5	14.1
Zm00001d013167	0	0	0	0	0	0	0	0	0	0	0	0	0	0	0	0	0	0	0	0	0	0	0	0	0	0.5	0.4
Zm00001d013168	4.5	6.7	3.8	4.7	6.3	4.3	3.4	2.3	2	2.7	11.5	9.5	4.9	2.5	1.6	2	2	3	2.6	2.2	2.8	5.3	3	14.1	7.1	8.9	10.3
Zm00001d013169	0.2	0	0	0	0.4	0	0	0	0	0	0	0	0	0	0	0	0	0	0	0	0	0	0	0	0	0	0.1
Zm00001d013170	0.2	0.1	0	0.1	0.1	0	0	0	0	0	0	0	0	0	0	0	0	0	0	0	0	0	0	0	0	0.7	0.8
Zm00001d013172	0.2	0.1	0.1	0.1	0	0	0	0	0	0	0	0	0	0	0	0	0	0	0	0	0	0	0	0	0	0	0.1
Zm00001d013173	0.5	0.8	0.5	0.6	1	0.4	0.2	0.1	0.1	0.2	0.7	1	2	1.7	2	1.3	1	0.3	0.4	0.3	0.3	0.5	2.1	0.7	1.4	1.8	1.7
Zm00001d013175	0	0	0	0	0	0	0	0	0	0	0.1	0	0	0	0	0	0	0	0	0	0	0	0	0	0	0.1	0
Zm00001d013176	4.9	4.9	5.1	4.5	3.2	8.7	9.1	8.5	8.6	8.1	7.6	6.2	7.9	5.8	6.3	9.6	9.8	8.3	6.8	7.2	6.5	12.2	0.8	6.1	1.8	10.6	11
Zm00001d013177	0.8	0.8	0.8	1	0.9	0	0.1	0	0	0.1	1.7	1.8	3	1.3	0.8	0.2	0.1	0.1	0.1	0.2	0.2	2.8	0.3	1.3	0.2	9.3	9.4
Zm00001d013178	0.3	0.2	0	0	0.1	0	0	0	0	0	0.1	0	0	0	0	0	0	0	0	0	0	0	0	0	0	1.6	1.2
Zm00001d013179	7.8	7.3	6.6	8	9.1	1.8	2.1	1.3	1.4	1	18.6	19.9	21.6	22.8	19.3	10.3	7.4	4.6	4.2	3.2	2.9	7.5	7.8	12.1	16.2	20.5	22.6
Zm00001d013181	0.6	0.3	0	0	0.1	0.2	0.1	0	0	0	0.1	0	0	0.1	0.1	0	0.1	0	0	0	0.1	0.1	0.1	0.1	0	0.8	0.9
Zm00001d013182	22.8	7.6	3.8	3.9	5.4	8.5	2.1	1.8	1.9	1.7	4.8	2.9	1.3	1.1	1.1	0.9	0.8	2.5	1.7	2.1	1.9	2.4	0.8	5.2	4.2	10.9	11.5
Zm00001d013183	27.2	2.6	0.6	1.2	1.1	9.8	1	0.3	0.3	0.2	1.4	0.5	0.2	0.2	0.3	0.1	0.3	1	0.3	0.5	0.4	0.4	0.1	0.8	0.5	0.9	1
Zm00001d013184	2.9	3.7	4.2	4.6	6	0.3	0.7	0.3	0.3	0.4	3.6	3.7	2	3.5	2.5	2.1	2	1.4	1.2	1.1	1.6	1.9	9.6	3.7	6.1	7	6.5
Zm00001d013185	0.9	0.4	0.2	0.2	0.4	0.7	0.5	0.1	0.1	0.1	0.7	0.1	0.2	0.2	0.5	0.3	0.2	0.7	0.4	0.7	0.8	0.1	0.5	0.3	0.5	5	3.1
Zm00001d013186	0.3	0.4	0.6	0.6	0.7	0.6	0.5	0.6	0.6	0.5	0.5	0.5	0.5	0.5	0.3	0.5	0.4	0.5	0.5	0.5	0.5	1.2	0.1	0.7	0.3	2.3	2.6
Zm00001d013187	0.1	0.2	0.1	0.1	0.1	0	0	0	0	0	1.4	1	0.5	0.3	0.2	0.1	0	0	0	0	0	0.1	0.1	1.3	1.3	0.4	0.7
Zm00001d018036	8.2	14.1	13.8	11.9	10.3	9.9	12.1	7.9	6.9	5.9	10.1	10.7	12.1	10.9	11.1	14.9	18	11.9	9.7	8.3	7.2	9.9	12.4	9.6	7.9	10.1	11
Zm00001d018038	1.6	2.7	1.6	1.6	1.5	0.1	0.1	0.2	0.1	0	0.6	0.4	0.3	0.2	0.1	0.3	0.2	0.3	0.2	0.2	0.3	0.7	0.1	0.5	0.1	0.2	0.3
Zm00001d018040	20.9	22.1	20.2	19.4	17.7	11.9	12	7.6	8.6	8.3	21.3	22	19.2	18.6	16.6	16.3	17.2	12.6	10.3	11.5	10.5	27.9	12.2	24.2	16.4	39.3	42.7
Zm00001d018041	1.5	1.8	1.1	1.4	1.6	2.2	2.4	1.8	1.8	1.7	3.1	5.2	6.4	7.8	7.6	6.1	4.5	4.4	3.3	2.9	2.5	1.7	41.9	2.6	10.6	2.7	3
Zm00001d018042	0.6	1.2	1.3	1.4	1.4	0.2	0.5	0.4	0.5	0.3	1.1	1	1.1	1.1	1	0.8	0.6	0.6	0.5	0.6	0.5	2.2	3.7	1.5	0.6	3.6	4.1
Zm00001d018043	5.9	8.9	8.9	7	5.4	6.4	10.6	7.5	6.7	6	9.4	9.4	9.2	10.8	10.7	11.7	15.2	10.2	8	8.2	6.9	7.7	7.9	8.8	12.9	7	6.3
Zm00001d018045	0.2	0.1	0.1	0.2	0.2	0	0	0	0	0	0.4	0.2	0	0.1	0.1	0	0.1	0	0	0	0	0.1	0	0.2	0	0.4	0.6
Zm00001d018046	6.6	9.1	15.5	21.8	16.5	2.1	2.2	2.4	2.7	1.9	13.4	11.6	17.1	10.4	7.8	6.4	3.1	3.3	3.2	5	3.8	27.9	16.5	13	5	31.3	37.3
Zm00001d018047	4.5	8.7	9.5	12.7	12.2	5.3	7.5	7.9	8.9	8.3	12.6	12.7	15.4	13	10.9	10.5	9.1	8.6	8.4	10.8	10	19.7	2.5	11.6	7.3	31	35.9
Zm00001d018048	0	0.1	0.1	0.1	0	0	0.1	0	0.1	0	0.1	0.2	0.1	0.1	0	0.1	0	0.1	0.1	0.1	0	0.1	0	0	0	0	0
Zm00001d036442	83	53	48	45	49	93.3	39.8	30.9	31.2	24.7	59.7	64.1	70.8	73.4	76.2	78.8	76.3	44.2	35.6	37.4	30.5	45.5	23.4	49.1	51.5	111.3	111.3
Zm00001d036443	13.5	10.5	10.7	10	9.8	17	10.9	10.5	9	8.8	13.2	12.9	15.8	15.6	14.1	13.5	13.1	10.9	9.5	9.5	8.4	14.7	10	11.2	11.9	27.1	31.6
Zm00001d036446	0.1	0	0	0.1	0.1	0	0	0	0.1	0	0.1	0.1	0.1	0.1	0.1	0.1	0.1	0	0	0	0	0.1	0	0.1	0.1	0	0
Zm00001d036447	2.3	4.5	4.5	4	4.3	4.9	5.7	4.8	4.2	3.9	4.6	4.3	3.2	4.2	3.7	4.1	5.6	5.2	5.4	4.2	4.4	3.1	2.8	4.3	5.5	9.3	9.8
Zm00001d036448	10.3	13.1	14.7	14.4	11.8	11.1	12.8	10	8.8	7.6	13	13.4	17.3	16.7	17.9	21.2	18.3	13.2	10.5	11.1	9.1	16.1	9.6	12	14.9	33.3	27.3
Zm00001d036449	0	0	0	0.1	0	0	0	0	0	0	0.3	0.2	0.2	0.3	0.3	0.3	0.1	0	0.1	0.1	0.1	0.5	0.1	0.2	0.1	1	1.3
Zm00001d036450	0	0	0	0	0	0.7	0.1	0	0.1	0	0	0	0	0	0	0	0	0.2	0	0	0	0	0	0	0	0	0
Zm00001d036451	14.1	22	21.4	22	20	36.7	49.8	38.8	35.6	36.4	29.4	28.3	35.9	31	33.4	55.9	64.2	48.4	35.5	34.8	33.4	37.3	14.1	26.3	24.4	40.6	38.8
Zm00001d036452	0	0.6	0	0	0.6	0	0	0	0	0	0	0	0	0	0	0	0	0	0	0	0	0	0	0	0	0	0
Zm00001d036454	10.3	13.2	11.6	11.9	10.7	8.8	12	11.9	14.5	13.1	25.9	26.2	17.9	18.4	15.8	13.1	13.8	13.9	13.7	14.3	13.7	14.8	14.7	28.1	54.4	34.1	36.8
Zm00001d036455	34	7.8	3.7	5.6	6	4	1	0.4	0.4	0.2	13.4	8.3	10.4	5.7	7.4	4	0.7	2.3	0.8	1.4	1.2	3.5	0.5	7.5	4.8	4.9	3.5
Zm00001d022043	36.2	23.1	24.3	23.9	30.1	16	11.3	7.7	6.2	7	7.5	8.3	8.4	8.8	10.6	13.1	14.7	12.1	9.6	8.8	9.7	8.4	2.4	7.3	2.2	9	8.6
Zm00001d022044	0	0	0	0	0	0	0	0	0	0	0.1	0.1	0.1	0.1	0.1	0.1	0.1	0.1	0	0	0.1	0	0.1	0.1	0	0.2	0.4
Zm00001d022045	7.1	7.8	5.5	6.3	7.7	2.4	2.5	1.7	2.2	1.6	6.5	6.5	9.4	7.7	9.1	6.8	4.9	3.7	3.1	3.4	2.9	8	6.3	6.1	3.5	30.9	25.2
Zm00001d022046	1.9	3.2	3.7	4.1	3.8	1.9	3.1	3.1	3.4	3	4.6	4.4	4.1	3.4	3	3.4	2.9	3.3	3	3.4	3	6.1	1.5	4.6	1.7	7.3	7.6
Zm00001d022048	11.6	16.2	14.1	14.3	12.3	13.4	13.6	10.5	7.6	7.6	13.4	14.5	17.1	18.5	18.9	18.5	19.1	15.9	11.8	11.1	9.4	13.2	7	13.8	9.3	23	19.6
Zm00001d022049	14	14.5	14.7	13.8	10.2	10.1	9.4	6.2	5	4.6	10.2	10.1	10.7	11.2	11.2	14	16.7	8.4	6.4	6.4	5.4	13	3.6	11.4	7.6	10.7	9.8
Zm00001d047723	1.7	2.7	3.5	4.7	5.1	0.1	0.2	0.1	0	0	15.2	20.5	13.7	14.6	12	3.6	1.8	1.2	0.6	1	0.5	1.3	2	13.4	2.2	1.3	1.6
Zm00001d047726	0.2	1.2	0.9	1	1.1	2	3.3	2.3	1.6	2.6	5.1	5	16.7	10.8	9.8	8.4	7.2	4.9	3.4	2.4	3	4.3	11.6	3.5	2.4	2.7	2.9
Zm00001d047727	27.8	23.9	19.4	16.7	17.4	62.9	34.4	28	23.7	22.5	18.8	18.3	15.4	18.8	21.7	35.9	42.9	33.2	24.1	21.7	21.7	11.9	5.5	20.4	29	33.1	28.2
Zm00001d047728	0.1	0.1	0	0	0	0.1	0	0	0	0	0	0.1	0	0	0	0	0	0	0	0	0	0	0.1	0.1	0	0.4	0.8
Zm00001d047729	0	0	0	0	0	0	0	0	0	0	0	0	0	0	0	0	0	0	0	0	0	0	0	0	0	0	0
Zm00001d047732	1.6	2.9	0.9	1	1.1	0.3	0.4	0.1	0.1	0.1	1.1	1	1.2	0.7	0.5	0.5	0.3	0.4	0.3	0.3	0.3	1.3	0.3	1.2	0.5	2.5	2.7
Zm00001d047736	0.2	0.1	0	0	0.1	0.2	0.1	0	0	0	0.1	0.2	0.1	0.4	0.6	0.2	0.3	0.2	0.2	0.1	0.2	0.1	0.8	0.1	3.3	0.3	0.9
Zm00001d047737	0.2	0.3	0.1	0.1	0.2	0	0	0	0	0	0.7	0.8	0.5	1.8	2.1	0.1	0.1	0	0	0	0	0	0	0.3	0.1	0	0
Zm00001d047738	4.9	2	2	2.3	3.7	0.4	0.2	0.3	0.4	0.4	2.3	2.1	2.3	1.3	1.1	0.4	0.2	0.4	0.6	0.5	0.9	0.6	0.4	2.1	0.5	1.8	1.8
Zm00001d047739	3.1	6.7	9.5	13.1	12.8	4.2	6.5	9.4	10.3	8.4	13	12.5	13.9	15.1	11.3	9.3	7.5	7.3	9	9.7	8.4	13.3	11.8	12.4	10.6	25.1	30.4
Zm00001d047740	0.1	0.1	0	0	0.1	0	0	0	0	0	0	0.1	0	0	0.3	0	0	0	0	0	0.1	0	45.1	0	0.1	0	0

## Sheet: Table S6
Table S6 Description of MQTL identified in the present study for ear traits in maize
Meta-QTL	Chr	Position(cM)	CI(95%)	Flanking marker	Physical position of flanking markers (bp)	QTL Integrated	Traits associated with the MQTL	Candidate Genes	Reported genes	Referencce
MQTL1	1	301.72	5.11	eil3-myb75	51839504-53370381	8	HKW, EW, EL, ERN, KNR, ED	36
MQTL2	1	378.49	5.18	prh36-cl29906_1	69743529-72300404	4	EW, EL, HKW	41	Zm00001d029454, Zm00001d029464	Sun et al. 2021; Baye et al. 2022; Li et al. 2010 [60-62]
MQTL3	1	517.96	0.43	umc1590-hak26	184897760-185536651	4	EL, ERN, KNR, HKW	16	Zm00001d031290	Brugière et al. 2017 [63]
MQTL4	2	438.65	4.38	cl9864_1-nfd101b	202588963-204047868	11	CD, ED, ERN, KNR, EW	55
MQTL5	2	464.78	4.04	aco5-pco129049	207465555-209518574	5	ED, HKW, ERN	49	Zm00001d006451	Liu et al. 2017 [64]
MQTL6	3	397.72	7.66	si946015a02-pco088261	172229147-174893608	5	EW, HKW, EL	65
MQTL7	3	400.12	2.48	pza02402-pco088261	174100666-174893608	6	HKW, EW, ERN, CD	21
MQTL8	4	353.28	5.7	grftf9-bhlh13	159322444-160963697	7	CD, ED, HKW, KNR, EW	54
MQTL9	4	426.27	3.02	ereb14-ereb57	179070181-179565262	4	HKW, EW, CD, ERN	16
MQTL10	4	447.27	4.87	bhlh36-ereb17	182751796-183996699	4	EL, HKW, ED	33	Zm00001d052197	Wang et al. 2023 [65]
MQTL11	4	478.92	5.21	c3h50-npi570	188826682-189175233	3	EL, ERN, HKW	15	Zm00001d052399	Zhan et al. 2018 [66]
MQTL12	4	510.9	4.46	emp11-umc2285	190301720-191358538	4	EL, HKW, ED	35	Zm00001d052450, Zm00001d052475	Ren et al. 2017; Baye et al. 2022; Wang et al. 2023; Sun et al. 2021 [60, 61, 65, 67]
MQTL13	4	528.91	7.16	ofp21-bzip81	194504909-198576750	3	EL, HKW, KNR	102	Zm00001d052606	Zaidi et al. 2022 [68]
MQTL14	4	566.53	4.06	pap14-IDP8537	208792099-216141277	6	EL, ERN, ED	113
MQTL15	5	66.72	7.84	umc2591-umc1679	2774829-3493834	6	ERN, HKW, KNR, EL	47
MQTL16	5	190.8	7.87	AY110835-tub4	14083976-15368222	5	HKW, EL, KNR	58	Zm00001d013575, Zm00001d013603	Khatun et al. 2022; Baye et al. 2022; Shen et al. 2019 [61, 69, 70]
MQTL17	5	279.2	2.08	xat4-pza02676	60563835-62613757	5	KNR, HKW, EW, ERN	50
MQTL18	5	302.22	0.4	ubi1-hppd1	84630842-86086755	3	ERN, CD, EL	28	Zm00001d015342	Zhou et al. 2020 [71]
MQTL19	5	401.88	1.69	thx24-mybr94	179111776-179740023	9	CD, KNR, ERN, EL, ED	35
MQTL20	5	453.21	4.19	umc1722-pco093974b	192003421-193147606	3	ERN, EL, HKW	29
MQTL21	5	557.76	7.18	nbcs16-expa2	211694641-212485307	6	EL, EW, ED, HKW	28	Zm00001d018024	Luo et al. 2022 [72]
MQTL22	6	55.26	2.95	bhlh45-gpc2	7226400-7242155	4	KNR, CD, HKW, ERN	2
MQTL23	6	78.65	1.7	upl6-jac1	29933027-33195150	3	EL, HKW, EW	38	Zm00001d035535	Liu et al. 2019 [73]
MQTL24	6	166.52	6.54	c3h26-ago10b	101178916-106367670	4	KNR, HKW, ERN	102	Zm00001d036894	Choe et al. 2016 [74]
MQTL25	6	326.35	5.81	pco060587-lbd32	150267525-151283466	3	EL, HKW, KNR	28
MQTL26	7	188.96	0.38	glk101-sdg110a	86094098-87811711	7	EW, ED, EL, HKW, ERN	19	Zm00001d020019, Zm00001d020020	Zhu et al. 2018 [75]
MQTL27	7	271.65	1.52	acco2-asc1	128315057-131857649	11	EL, HKW, KNR, EL, ED, ERN	76	Zm00001d020686, Zm00001d020717	Zhou et al. 2015; Ning et al. 2021; Wang et al. 2020 [76-78]
MQTL28	8	308.18	6.73	PCO147505-pdk2	109459050-114510881	8	ERN, KNR, CD, HKW	86	Zm00001d010321, Zm00001d010368, Zm00001d010371	Zhou et al. 2021; Wang et al. 2023; Zhang et al. 2020 [65, 79, 80]
MQTL29	8	367.55	1.53	mkp1-blk3	137163480-138000993	12	EL, CD, HKW, ERN	25
MQTL30	9	166.52	5.03	dhn2-fat2	18926278-20382973	3	CD, HKW, ERN	64
MQTL31	9	211.16	2.26	IDP1681-polm3	27328993-28457275	3	HKW, ED, KNR	13	Zm00001d045589	Li et al. 2022 [81]
MQTL32	9	241.59	2.6	IDP8040-acp1	94351762-97680959	3	ERN, EW	47	Zm00001d046555, Zm00001d046591	Wang et al. 2023; Jia et al. 2020 [65, 82]
MQTL33	9	255.39	2.74	umc1743-hm2	103022976-106804839	6	ED, HKW, ERN, EL	89	Zm00001d046718, Zm00001d046723, Zm00001d046783	Gong et al. 2023; Baye et al. 2022; Fei et al. 2022 [61, 83, 84]
MQTL34	9	316.31	5.28	IDP8972-es1	126972983-128745486	4	EL, HKW, EW	48
MQTL35	9	436.95	5.65	AY109550-umc2519	144877403-145088995	4	ERN, HKW, KNR	8
MQTL36	9	577.38	0.9	cl13090_1b-sut7	154130897-154426112	6	ERN, EW, HKW	12	Zm00001d048311	Ma et al. 2022 [85]
MQTL37	10	73.47	3.65	phm3631-pyk2	4263636-4298209	5	HKW, ERN, KNR	6
MQTL38	10	146.25	6.39	tubtf14-IDP3794	8711082-10309476	3	CD, ED, KNR	43
MQTL39	10	219.18	1.86	bhlh162-AY112073	83290724-83447138	5	CD, ED, ERN	4
MQTL40	10	256.94	3.76	TIDP3000-odo1	107999211-110663551	5	HKW, ERN, ED	51
MQTL41	10	292.67	0.48	myb84-mlkp2	125369798-125491008	9	EL, HKW, ERN, ED, KNR	4
References
[60]	Sun, H.; Xu, H.; Li, B.; Shang, Y.; Wei, M.; Zhang, S.; Zhao, C.; Qin, R.; Cui, F.; Wu, Y. The brassinosteroid biosynthesis gene, ZmD11, increases seed size and quality in rice and maize. Plant Physiology and Biochemistry. 2021, 160, 281-293. https://doi.org/10.1016/j.plaphy.2021.01.031.
[61]	Baye, W.; Xie, Q.; Xie, P. Genetic Architecture of Grain Yield-Related Traits in Sorghum and Maize. International Journal of Molecular Sciences. 2022, 23, 2405. https://doi.org/10.3390/ijms23052405.
[62]	Li, Q.; Yang, X.; Bai, G.; Warburton, M.L.; Mahuku, G.; Gore, M.; Dai, J.; Li, J.; Yan, J. Cloning and characterization of a putative GS3 ortholog involved in maize kernel development. Theoretical and Applied Genetics. 2010, 120, 753-763. https://doi.org/10.1007/s00122-009-1196-x.
[63]	Brugière, N.; Zhang, W.; Xu, Q.; Scolaro, E.J.; Lu, C.; Kahsay, R.Y.; Kise, R.; Trecker, L.; Williams, R.W.; Hakimi, S.; et al. Overexpression of RING Domain E3 Ligase ZmXerico1 Confers Drought Tolerance through Regulation of ABA Homeostasis. Plant Physiology. 2017, 175, 1350-1369. https://doi.org/10.1104/pp.17.01072.
[64]	Liu, J.; Huang, J.; Guo, H.; Lan, L.; Wang, H.; Xu, Y.; Yang, X.; Li, W.; Tong, H.; Xiao, Y.; et al. The Conserved and Unique Genetic Architecture of Kernel Size and Weight in Maize and Rice. Plant Physiol. 2017, 175, 774-785. https://doi.org/10.1104/pp.17.00708.
[65]	Wang, C.; Li, H.; Long, Y.; Dong, Z.; Wang, J.; Liu, C.; Wei, X.; Wan, X. A Systemic Investigation of Genetic Architecture and Gene Resources Controlling Kernel Size-Related Traits in Maize. International Journal of Molecular Sciences. 2023, 24, 1025. https://doi.org/10.3390/ijms24021025.
[66]	Zhan, J.; Wang, F.; Xing, W.; Liu, J.; Fan, Z.; Tao, Y. Fine mapping and candidate gene prediction of a major QTL for kernel number per ear in maize. Molecular Breeding. 2018, 38, 27. https://doi.org/10.1007/s11032-018-0787-0.
[67]	Ren, X.; Pan, Z.; Zhao, H.; Zhao, J.; Cai, M.; Li, J.; Zhang, Z.; Qiu, F. EMPTY PERICARP11 serves as a factor for splicing of mitochondrial nad1 intron and is required to ensure proper seed development in maize. Journal of Experimental Botany. 2017, 68, 4571-4581. https://doi.org/10.1093/jxb/erx212.
[68]	Zaidi, P.H.; Shahid, M.; Seetharam, K.; Vinayan, M.T. Genomic Regions Associated With Salinity Stress Tolerance in Tropical Maize (Zea Mays L.). Frontiers in Plant Science. 2022, 13, 869270. https://doi.org/10.3389/fpls.2022.869270.
[69]	Khatun, M.; Monir, M.M.; Lou, X.; Zhu, J.; Xu, H. Genome-wide association studies revealed complex genetic architecture and breeding perspective of maize ear traits. BMC Plant Biology. 2022, 22, 537. https://doi.org/10.1186/s12870-022-03913-1.
[70]	Shen, X.; Zhao, R.; Liu, L.; Zhu, C.; Li, M.; Du, H.; Zhang, Z. Identification of a candidate gene underlying qKRN5b for kernel row number in Zea mays L. Theoretical and Applied Genetics. 2019, 132, 3439-3448. https://doi.org/10.1007/s00122-019-03436-8.
[71]	Zhou, Z.; Li, G.; Tan, S.; Li, D.; Weiß, T.M.; Wang, X.; Chen, S.; Würschum, T.; Liu, W.; Léon, J. A QTL atlas for grain yield and its component traits in maize (Zea mays). Plant Breeding. 2020, 139, 562-574. https://doi.org/10.1111/pbr.12809.
[72]	Luo, Y.; Zhang, M.; Liu, Y.; Liu, J.; Li, W.; Chen, G.; Peng, Y.; Jin, M.; Wei, W.; Jian, L.; et al. Genetic variation in YIGE1 contributes to ear length and grain yield in maize. New Phytologist. 2022, 234, 513-526. https://doi.org/10.1111/nph.17882.
[73]	Liu, L.; Huang, J.; He, L.; Liu, N.; Du, Y.; Hou, R.; Du, H.; Qiu, F.; Zhang, Z. Dissecting the genetic architecture of important traits that enhance wild germplasm resource usage in modern maize breeding. Molecular Breeding. 2019, 39, 157. https://doi.org/10.1007/s11032-019-1061-9.
[74]	Choe, E.; Drnevich, J.; Williams, M.M. Identification of Crowding Stress Tolerance Co-Expression Networks Involved in Sweet Corn Yield. PLoS One. 2016, 11, e0147418. https://doi.org/10.1371/journal.pone.0147418.
[75]	Zhu, X.M.; Shao, X.Y.; Pei, Y.H.; Guo, X.M.; Li, J.; Song, X.Y.; Zhao, M.A. Genetic Diversity and Genome-Wide Association Study of Major Ear Quantitative Traits Using High-Density SNPs in Maize. Front Plant Sci. 2018, 9, 966. https://doi.org/10.3389/fpls.2018.00966.
[76]	Zhou, G.; Zhu, Q.; Yang, G.; Huang, J.; Cheng, S.; Yue, B.; Zhang, Z. qEL7.2 is a pleiotropic QTL for kernel number per row, ear length and ear weight in maize (Zea mays L.). Euphytica. 2015, 203, 429-436. https://doi.org/10.1007/s10681-014-1307-x.
[77]	Ning, Q.; Jian, Y.; Du, Y.; Li, Y.; Shen, X.; Jia, H.; Zhao, R.; Zhan, J.; Yang, F.; Jackson, D.; et al. An ethylene biosynthesis enzyme controls quantitative variation in maize ear length and kernel yield. Nature Communications. 2021, 12, 5832. https://doi.org/10.1038/s41467-021-26123-z.
[78]	Wang, H.Q.; Liu, P.; Zhang, J.W.; Zhao, B.; Ren, B.Z. Endogenous Hormones Inhibit Differentiation of Young Ears in Maize (Zea mays L.) Under Heat Stress. Front Plant Sci. 2020, 11, 533046. https://doi.org/10.3389/fpls.2020.533046.
[79]	Zhou, Q.; Fu, Z.; Liu, H.; Wang, J.; Guo, Z.; Zhang, X.; Tian, R.; Liu, Y.; Qu, J.; Li, W.; et al. Mining novel kernel size‐related genes by pQTL mapping and multi‐omics integrative analysis in developing maize kernels. Plant Biotechnology Journal. 2021, 19, 1489-1491. https://doi.org/10.1111/pbi.13634.
[80]	Zhang, X.; Guan, Z.; Li, Z.; Liu, P.; Ma, L.; Zhang, Y.; Pan, L.; He, S.; Zhang, Y.; Li, P.; et al. A combination of linkage mapping and GWAS brings new elements on the genetic basis of yield-related traits in maize across multiple environments. Theor Appl Genet. 2020, 133, 2881-2895. https://doi.org/10.1007/s00122-020-03639-4.
[81]	Li, S.; Meng, S.; Weng, J.; Wu, Q. Fine-tuning shoot meristem size to feed the world. Trends in Plant Science. 2022, 27, 355-363. https://doi.org/10.1016/j.tplants.2021.10.004.
[82]	Jia, T.J.; Jing-jing, L.I.; Wang, L.F.; Cao, Y.Y.; Ma, J.; Wang, H.; Zhang, D.F.; Li, H.Y. Evaluation of drought tolerance in ZmVPP1-overexpressing transgenic inbred maize lines and their hybrids. Journal of Integrative Agriculture. 2020, 19, 2177-2187. https://doi.org/10.1016/s2095-3119(19)62828-5.
[83]	Gong, D.; Wang, Y.; Zhang, H.; Liang, K.; Sun, Q.; Qiu, F. Overexpression of ZmKL9 increases maize hybrid hundred kernel weight. Plant Biotechnology Journal. 2023, 21, 451-453. https://doi.org/10.1111/pbi.13957.
[84]	Fei, X.; Wang, Y.; Zheng, Y.; Shen, X.; E, L.; Ding, J.; Lai, J.; Song, W.; Zhao, H. Identification of two new QTLs of maize (Zea mays L.) underlying kernel row number using the HNAU-NAM1 population. BMC Genomics. 2022, 23, 593. https://doi.org/10.1186/s12864-022-08793-1.
[85]	Ma, Y.; Li, D.; Xu, Z.; Gu, R.; Wang, P.; Fu, J.; Wang, J.; Du, W.; Zhang, H. Dissection of the Genetic Basis of Yield Traits in Line per se and Testcross Populations and Identification of Candidate Genes for Hybrid Performance in Maize. International Journal of Molecular Sciences. 2022, 23, 5074. https://doi.org/10.3390/ijms23095074.

## Sheet: Table S7
Table S7 Candidate genes detected by meta-analysis
MQTL	Chr	Physical position (bp)	Genes
MQTL1	1	51839504-53370381	Zm00001d028930 Zm00001d028931 Zm00001d028935 Zm00001d028936 Zm00001d022729 Zm00001d028939 Zm00001d028940 Zm00001d028941 Zm00001d028946 Zm00001d022730 Zm00001d022731 Zm00001d028947 Zm00001d028948 Zm00001d028949 Zm00001d022732 Zm00001d028950 Zm00001d028951 Zm00001d028952 Zm00001d028953 Zm00001d028954 Zm00001d028955 Zm00001d028956 Zm00001d028957 Zm00001d028958 Zm00001d028960 Zm00001d028962 Zm00001d0…
MQTL2	1	69743529-72300404	Zm00001d029419 Zm00001d029420 Zm00001d029422 Zm00001d029424 Zm00001d029425 Zm00001d029426 Zm00001d029427 Zm00001d029428 Zm00001d029429 Zm00001d029430 Zm00001d029431 Zm00001d029432 Zm00001d029435 Zm00001d029437 Zm00001d029438 Zm00001d029441 Zm00001d029442 Zm00001d029443 Zm00001d029444 Zm00001d029446 Zm00001d022757 Zm00001d029447 Zm00001d029448 Zm00001d022758 Zm00001d029449 Zm00001d029451 Zm00001d0…
MQTL3	1	184897760-185536651	Zm00001d031279 Zm00001d031280 Zm00001d031281 Zm00001d031282 Zm00001d031283 Zm00001d022873 Zm00001d031286 Zm00001d031287 Zm00001d031288 Zm00001d022874 Zm00001d031289 Zm00001d031290 Zm00001d031291 Zm00001d031292 Zm00001d031293 Zm00001d031296
MQTL4	2	202588963-204047868	Zm00001d006237 Zm00001d006238 Zm00001d006239 Zm00001d006240 Zm00001d006241 Zm00001d006242 Zm00001d006243 Zm00001d006244 Zm00001d006246 Zm00001d006247 Zm00001d006248 Zm00001d006249 Zm00001d006250 Zm00001d006251 Zm00001d006252 Zm00001d006253 Zm00001d006254 Zm00001d006255 Zm00001d006256 Zm00001d006257 Zm00001d006260 Zm00001d006261 Zm00001d006262 Zm00001d006263 Zm00001d006265 Zm00001d006266 Zm00001d0…
MQTL5	2	207465555-209518574	Zm00001d006422 Zm00001d006423 Zm00001d006424 Zm00001d006425 Zm00001d006426 Zm00001d006428 Zm00001d006430 Zm00001d006433 zma-MIR2275d Zm00001d006434 Zm00001d006435 Zm00001d006437 Zm00001d006438 Zm00001d006439 Zm00001d006440 Zm00001d006441 Zm00001d006442 Zm00001d006443 Zm00001d006444 Zm00001d006445 Zm00001d006446 Zm00001d006447 Zm00001d006448 Zm00001d006449 Zm00001d006450 Zm00001d006451 Zm00001d006…
MQTL6	3	172229147-174893608	Zm00001d042569 Zm00001d042571 Zm00001d000646 Zm00001d042572 Zm00001d042573 Zm00001d042574 Zm00001d042575 Zm00001d042578 Zm00001d042580 Zm00001d042581 Zm00001d042582 Zm00001d042583 Zm00001d042584 Zm00001d042585 Zm00001d042588 Zm00001d042589 Zm00001d042590 Zm00001d042591 Zm00001d042593 Zm00001d042594 Zm00001d042595 Zm00001d042596 Zm00001d042598 Zm00001d042599 Zm00001d042600 Zm00001d042601 Zm00001d0…
MQTL7	3	174100666-174893608	Zm00001d042621 Zm00001d042622 Zm00001d042623 Zm00001d042624 Zm00001d042625 Zm00001d042626 Zm00001d042627 Zm00001d000649 Zm00001d042628 Zm00001d042630 Zm00001d042631 Zm00001d042632 Zm00001d042633 Zm00001d042634 Zm00001d042635 Zm00001d042636 Zm00001d042637 Zm00001d000650 Zm00001d000651 Zm00001d042638 Zm00001d042639
MQTL8	4	159322444-160963697	Zm00001d051456 Zm00001d051457 Zm00001d051458 Zm00001d051459 Zm00001d051460 Zm00001d051461 Zm00001d051462 Zm00001d026923 Zm00001d051463 Zm00001d051464 Zm00001d051465 Zm00001d051466 Zm00001d051467 Zm00001d051468 Zm00001d051471 Zm00001d051472 Zm00001d051473 Zm00001d051474 Zm00001d051475 Zm00001d026924 Zm00001d051478 Zm00001d051479 Zm00001d051480 Zm00001d051481 Zm00001d051482 Zm00001d051483 Zm00001d0…
MQTL9	4	179070181-179565262	Zm00001d052087 Zm00001d052089 Zm00001d052090 Zm00001d052091 Zm00001d052092 Zm00001d052093 Zm00001d052094 Zm00001d052095 Zm00001d052096 Zm00001d052097 Zm00001d052098 Zm00001d052099 Zm00001d052100 zma-MIR164f Zm00001d052101 Zm00001d052102
MQTL10	4	182751796-183996699	Zm00001d052192 Zm00001d052193 Zm00001d052194 Zm00001d052195 Zm00001d052197 Zm00001d052198 Zm00001d052199 Zm00001d052200 Zm00001d052201 Zm00001d052202 Zm00001d052203 Zm00001d052204 Zm00001d052205 Zm00001d052206 Zm00001d052207 Zm00001d052208 Zm00001d052209 Zm00001d052210 Zm00001d052211 Zm00001d052212 Zm00001d052213 Zm00001d052215 Zm00001d052216 Zm00001d052218 Zm00001d052219 Zm00001d052220 Zm00001d0…
MQTL11	4	188826682-189175233	Zm00001d052385 Zm00001d052386 Zm00001d052387 Zm00001d052389 Zm00001d052390 Zm00001d052391 Zm00001d052392 Zm00001d052393 Zm00001d052394 Zm00001d052395 Zm00001d052396 Zm00001d026960 Zm00001d052397 Zm00001d052399 Zm00001d052401
MQTL12	4	190301720-191358538	Zm00001d052450 Zm00001d052451 Zm00001d052452 Zm00001d052453 Zm00001d052457 Zm00001d052458 Zm00001d052460 Zm00001d052461 Zm00001d052462 Zm00001d052463 Zm00001d052464 Zm00001d052467 Zm00001d052468 Zm00001d052469 Zm00001d052470 Zm00001d052471 Zm00001d052472 Zm00001d052473 Zm00001d052474 Zm00001d052475 Zm00001d052476 Zm00001d052478 Zm00001d052479 Zm00001d052480 Zm00001d052481 Zm00001d052482 Zm00001d0…
MQTL13	4	194504909-198576750	Zm00001d052605 Zm00001d052606 Zm00001d052609 Zm00001d052610 Zm00001d052611 Zm00001d052612 Zm00001d052613 Zm00001d052614 Zm00001d052615 Zm00001d052616 Zm00001d052618 Zm00001d052619 Zm00001d052620 Zm00001d052621 Zm00001d052622 Zm00001d026968 Zm00001d052624 Zm00001d052625 Zm00001d052627 Zm00001d052628 Zm00001d052630 Zm00001d026969 Zm00001d052632 Zm00001d052633 Zm00001d052634 Zm00001d052635 Zm00001d0…
MQTL14	4	208792099-216141277	Zm00001d053006 Zm00001d053007 Zm00001d053008 Zm00001d053009 Zm00001d053010 Zm00001d053011 Zm00001d053014 Zm00001d053015 Zm00001d053016 Zm00001d053017 Zm00001d053018 Zm00001d053020 Zm00001d026985 Zm00001d053022 Zm00001d053024 Zm00001d053025 Zm00001d053026 Zm00001d053028 Zm00001d053029 Zm00001d053030 Zm00001d053031 Zm00001d053035 Zm00001d053036 Zm00001d053038 Zm00001d053039 Zm00001d053040 Zm00001d0…
MQTL15	5	2774829-3493834	Zm00001d012983 Zm00001d012984 Zm00001d012985 zma-MIR390b Zm00001d012988 Zm00001d012989 Zm00001d012990 Zm00001d012991 Zm00001d012992 Zm00001d012993 Zm00001d012994 Zm00001d012995 Zm00001d012996 Zm00001d012997 Zm00001d012998 Zm00001d012999 Zm00001d013002 Zm00001d013003 Zm00001d013004 Zm00001d013005 Zm00001d013006 Zm00001d013007 Zm00001d013008 Zm00001d013009 Zm00001d013010 Zm00001d013011 Zm00001d0130…
MQTL16	5	14083976-15368222	Zm00001d013549 Zm00001d013550 Zm00001d013551 Zm00001d013552 Zm00001d013553 Zm00001d013554 Zm00001d013555 Zm00001d013557 Zm00001d001512 Zm00001d013559 Zm00001d013560 Zm00001d013561 Zm00001d013562 Zm00001d013565 Zm00001d013566 Zm00001d013567 Zm00001d013568 Zm00001d013569 Zm00001d013570 Zm00001d013571 Zm00001d013572 Zm00001d013573 Zm00001d013574 Zm00001d001513 Zm00001d013575 Zm00001d013577 Zm00001d0…
MQTL17	5	60563835-62613757	Zm00001d014722 Zm00001d014723 Zm00001d014724 Zm00001d014725 Zm00001d014726 Zm00001d014727 Zm00001d014728 Zm00001d014729 Zm00001d014730 Zm00001d001561 Zm00001d001562 Zm00001d014731 Zm00001d014732 Zm00001d014733 Zm00001d014734 Zm00001d014735 Zm00001d014736 Zm00001d014737 Zm00001d014738 Zm00001d014739 Zm00001d014741 Zm00001d014742 Zm00001d014743 Zm00001d014744 Zm00001d014745 Zm00001d014748 Zm00001d0…
MQTL18	5	84630842-86086755	Zm00001d015327 Zm00001d015328 Zm00001d001585 Zm00001d015329 Zm00001d015330 Zm00001d001586 Zm00001d015331 Zm00001d015332 Zm00001d015333 Zm00001d015334 Zm00001d015335 Zm00001d015338 Zm00001d015339 Zm00001d015340 Zm00001d015341 Zm00001d015342 Zm00001d015344 Zm00001d015345 Zm00001d015346 Zm00001d015347 Zm00001d015348 Zm00001d015349 Zm00001d015350 Zm00001d015352 Zm00001d015353 Zm00001d015354 Zm00001d0…
MQTL19	5	179111776-179740023	Zm00001d016876 Zm00001d016877 Zm00001d016878 Zm00001d016879 Zm00001d016880 Zm00001d016881 Zm00001d016882 Zm00001d016883 Zm00001d016884 Zm00001d016885 Zm00001d016889 Zm00001d016890 Zm00001d016891 Zm00001d016892 Zm00001d016893 Zm00001d016894 Zm00001d016895 Zm00001d016896 Zm00001d016897 Zm00001d016898 Zm00001d016899 Zm00001d016900 Zm00001d016901 Zm00001d016902 Zm00001d016903 Zm00001d016905 Zm00001d0…
MQTL20	5	192003421-193147606	Zm00001d017293 Zm00001d017294 Zm00001d017296 Zm00001d017297 Zm00001d017298 Zm00001d017300 Zm00001d017301 Zm00001d017302 Zm00001d017303 Zm00001d017306 Zm00001d001709 Zm00001d017307 Zm00001d001710 Zm00001d017308 Zm00001d017310 Zm00001d017312 Zm00001d017316 Zm00001d017317 Zm00001d017318 Zm00001d017320 Zm00001d017321 Zm00001d017322 Zm00001d017323 Zm00001d017324 Zm00001d017325 Zm00001d017326 Zm00001d0…
MQTL21	5	211694641-212485307	Zm00001d018001 Zm00001d018002 Zm00001d018003 Zm00001d018004 Zm00001d018005 Zm00001d018006 Zm00001d018007 Zm00001d018008 Zm00001d018009 Zm00001d018010 Zm00001d018011 Zm00001d018012 Zm00001d018013 Zm00001d018014 Zm00001d018016 Zm00001d018017 Zm00001d018019 Zm00001d018021 Zm00001d018022 Zm00001d018024 Zm00001d018025 Zm00001d018026 Zm00001d018027 Zm00001d018028 Zm00001d018029 Zm00001d001736 Zm00001d0…
MQTL22	6	7226400-7242155	Zm00001d035155 Zm00001d035156
MQTL23	6	29933027-33195150	Zm00001d035509 Zm00001d035510 Zm00001d035511 Zm00001d035512 Zm00001d035514 Zm00001d035515 Zm00001d035516 Zm00001d035517 Zm00001d035519 Zm00001d035522 Zm00001d035526 Zm00001d035527 Zm00001d035528 Zm00001d035534 Zm00001d035535 Zm00001d035537 Zm00001d035538 Zm00001d035539 Zm00001d035540 Zm00001d035541 Zm00001d035542 Zm00001d035543 Zm00001d035544 Zm00001d035545 Zm00001d035546 Zm00001d035548 Zm00001d0…
MQTL24	6	101178916-106367670	Zm00001d036796 Zm00001d036797 Zm00001d036798 Zm00001d036799 Zm00001d036800 Zm00001d036801 Zm00001d036802 Zm00001d036803 Zm00001d001405 Zm00001d036804 Zm00001d036806 Zm00001d036807 Zm00001d001406 Zm00001d036812 Zm00001d036813 Zm00001d036814 Zm00001d036815 Zm00001d036816 Zm00001d036817 Zm00001d036818 Zm00001d036819 Zm00001d001407 Zm00001d036820 Zm00001d036821 Zm00001d036822 Zm00001d036823 Zm00001d0…
MQTL25	6	150267525-151283466	Zm00001d038167 Zm00001d038170 Zm00001d038171 Zm00001d038172 Zm00001d038173 Zm00001d038174 Zm00001d038175 Zm00001d038176 Zm00001d038177 Zm00001d038178 Zm00001d038179 Zm00001d038180 Zm00001d038181 Zm00001d038183 Zm00001d038184 Zm00001d038185 Zm00001d038186 Zm00001d038187 Zm00001d038189 Zm00001d038190 Zm00001d038191 Zm00001d038192 Zm00001d038193 Zm00001d038194 Zm00001d038195 Zm00001d001443 Zm00001d0…
MQTL26	7	86094098-87811711	Zm00001d020019 Zm00001d020020 Zm00001d020021 Zm00001d020023 Zm00001d020025 Zm00001d020028 Zm00001d001169 Zm00001d020030 Zm00001d020031 Zm00001d001170 Zm00001d001171 Zm00001d020032 Zm00001d020033 Zm00001d020034 Zm00001d020035 Zm00001d020036 Zm00001d020037 Zm00001d001172 Zm00001d020038
MQTL27	7	128315057-131857649	Zm00001d020686 Zm00001d001218 Zm00001d020687 Zm00001d020688 zma-MIR166j Zm00001d020689 Zm00001d020691 Zm00001d020692 Zm00001d020693 Zm00001d020694 Zm00001d020695 Zm00001d001219 Zm00001d020696 Zm00001d020697 Zm00001d020702 Zm00001d020703 Zm00001d020704 Zm00001d020705 Zm00001d020706 Zm00001d020707 Zm00001d020708 Zm00001d020711 Zm00001d020712 Zm00001d020713 Zm00001d020714 Zm00001d020717 Zm00001d0012…
MQTL28	8	109459050-114510881	Zm00001d010321 Zm00001d010322 Zm00001d010324 Zm00001d010325 Zm00001d008071 Zm00001d010327 Zm00001d010329 Zm00001d010330 Zm00001d010331 Zm00001d010333 Zm00001d010336 Zm00001d010337 Zm00001d010338 Zm00001d010339 Zm00001d010340 Zm00001d010341 Zm00001d010342 Zm00001d010343 Zm00001d010344 Zm00001d010345 Zm00001d010347 Zm00001d010348 Zm00001d010349 Zm00001d010350 Zm00001d010352 Zm00001d010353 Zm00001d0…
MQTL29	8	137163480-138000993	Zm00001d011037 Zm00001d011038 Zm00001d011040 Zm00001d011041 Zm00001d011042 Zm00001d011043 Zm00001d011044 Zm00001d011046 Zm00001d011047 Zm00001d011048 Zm00001d011049 Zm00001d011050 Zm00001d011051 Zm00001d011055 Zm00001d011056 Zm00001d011057 Zm00001d011058 Zm00001d011059 Zm00001d011060 Zm00001d011061 Zm00001d011062 Zm00001d011063 Zm00001d011064 Zm00001d011065 Zm00001d011066
MQTL30	9	18926278-20382973	Zm00001d045321 Zm00001d045322 Zm00001d045323 Zm00001d045324 Zm00001d045326 Zm00001d045327 Zm00001d045328 Zm00001d045329 Zm00001d045330 Zm00001d045331 Zm00001d045332 Zm00001d045334 Zm00001d045335 Zm00001d045336 Zm00001d045338 Zm00001d045339 Zm00001d045340 Zm00001d045341 Zm00001d045342 Zm00001d027062 Zm00001d045344 Zm00001d045347 Zm00001d045348 Zm00001d045349 Zm00001d045350 Zm00001d045351 Zm00001d0…
MQTL31	9	27328993-28457275	Zm00001d045583 Zm00001d045584 Zm00001d045586 Zm00001d045589 Zm00001d045590 Zm00001d045594 Zm00001d045595 Zm00001d045596 Zm00001d045597 Zm00001d045598 Zm00001d045599 Zm00001d045600 Zm00001d045603
MQTL32	9	94351762-97680959	Zm00001d046532 Zm00001d046533 Zm00001d046534 Zm00001d046535 Zm00001d046536 Zm00001d046537 Zm00001d046538 Zm00001d046539 Zm00001d046540 Zm00001d046542 Zm00001d046543 Zm00001d046545 Zm00001d046549 Zm00001d027141 Zm00001d046552 Zm00001d046553 Zm00001d046554 Zm00001d046555 Zm00001d046558 Zm00001d046559 Zm00001d046560 Zm00001d046561 Zm00001d046562 Zm00001d046563 Zm00001d046564 Zm00001d046565 Zm00001d0…
MQTL33	9	103022976-106804839	Zm00001d046706 Zm00001d046707 Zm00001d046708 Zm00001d046709 Zm00001d046710 Zm00001d046711 Zm00001d046713 Zm00001d046714 Zm00001d046715 Zm00001d046716 Zm00001d046717 Zm00001d046718 Zm00001d046719 Zm00001d046722 Zm00001d046723 Zm00001d046724 Zm00001d046725 Zm00001d046726 Zm00001d046727 Zm00001d046728 Zm00001d046729 Zm00001d046730 Zm00001d027150 Zm00001d046732 Zm00001d046733 Zm00001d046735 Zm00001d0…
MQTL34	9	126972983-128745486	Zm00001d047340 Zm00001d047342 Zm00001d047345 Zm00001d047346 Zm00001d047347 Zm00001d047349 Zm00001d047350 Zm00001d047351 Zm00001d047352 Zm00001d047353 Zm00001d047354 Zm00001d047355 Zm00001d047356 Zm00001d047358 Zm00001d047359 Zm00001d047361 Zm00001d047362 Zm00001d047363 Zm00001d047364 Zm00001d047366 Zm00001d047367 Zm00001d047368 Zm00001d047369 Zm00001d047371 Zm00001d047372 Zm00001d047373 Zm00001d0…
MQTL35	9	144877403-145088995	Zm00001d047906 Zm00001d047907 Zm00001d047908 Zm00001d047909 Zm00001d047910 Zm00001d047911 Zm00001d047912 Zm00001d047913
MQTL36	9	154130897-154426112	Zm00001d048299 Zm00001d027220 Zm00001d048301 Zm00001d048302 Zm00001d048303 Zm00001d048305 Zm00001d048306 Zm00001d048307 Zm00001d048308 Zm00001d048309 Zm00001d048310 Zm00001d048311
MQTL37	10	4263636-4298209	Zm00001d023374 Zm00001d023375 Zm00001d023376 Zm00001d023377 Zm00001d023378 Zm00001d023379
MQTL38	10	8711082-10309476	Zm00001d023523 Zm00001d023524 Zm00001d023525 Zm00001d023526 Zm00001d023527 Zm00001d023528 Zm00001d023529 Zm00001d023530 Zm00001d023052 Zm00001d023531 Zm00001d023054 Zm00001d023053 Zm00001d023532 Zm00001d023534 Zm00001d023535 Zm00001d023536 Zm00001d023537 Zm00001d023538 Zm00001d023539 Zm00001d023540 Zm00001d023055 Zm00001d023541 Zm00001d023542 Zm00001d023543 Zm00001d023544 Zm00001d023548 Zm00001d0…
MQTL39	10	83290724-83447138	Zm00001d024676 Zm00001d024677 Zm00001d024678 Zm00001d024679
MQTL40	10	107999211-110663551	Zm00001d025180 Zm00001d023155 Zm00001d025182 Zm00001d025183 Zm00001d025185 Zm00001d025186 Zm00001d025187 Zm00001d025188 Zm00001d025190 Zm00001d025191 Zm00001d025192 Zm00001d025193 Zm00001d025194 Zm00001d025195 Zm00001d025196 Zm00001d025199 Zm00001d025200 Zm00001d025201 Zm00001d025202 Zm00001d025203 Zm00001d025204 Zm00001d025205 Zm00001d025206 Zm00001d025207 Zm00001d025208 Zm00001d025209 Zm00001d0…
MQTL41	10	125369798-125491008	Zm00001d025664 Zm00001d025665 Zm00001d025666 Zm00001d025667

## Sheet: Table S8
Table S8 Ear traits QTLs mapped from 39 papers
Trait	Parent	Population type	Population size	Number of QTL	Referencce
HKW	Mo17 x Huangzao4	RIL	242	7	Liu et al. [86]
EL	Mo17 x Huangzao4	RIL	242	2	Zhang et al. [87]
ED	Mo17 x Huangzao4	RIL	242	5
HKW	D276/D72/A188/Jiao51	F1	277	5	Chen et al. [88]
KNR	D276/D72/A188/Jiao51	F1	277	6
ERN	D276/D72/A188/Jiao51	F1	277	7
EW	Chang7-2×TS142	F2:3	218	6	Zhao et al. [89]
HKW	Chang7-2×TS142	F2:3	218	3
EL	Chang7-2×TS142	F2:3	218	4
EW	Langhuang × TS141	F2:3	202	7
HKW	Langhuang × TS141	F2:3	202	4
EL	Langhuang × TS141	F2:3	202	4
EL	Yi16 ×B73	F2	236	2	Mei et al. [90]
ERN	Yi16 ×B73	F2	236	3
HKW	Yi16 ×B73	F2	236	3
EL	Yi16 ×B73	F2:3	216	1
ERN	Yi16 ×B73	F2:3	216	9
HKW	Yi16 ×B73	F2:3	216	4
EW	Mo17 x Huangzao4	RIL	239	2	Liu et al. [91]
ERN	B73xSICAU1212	F2	231	4	Yang et al. [92]
EL	B73xSICAU1212	F2	231	1
ED	B73xSICAU1212	F2	231	2
KNR	B73xSICAU1212	F2	231	1
HKW	B73xSICAU1212	F2	231	2
ERN	B73xSICAU1212	F2	233	3
EW	Zheng58 x Chang7-2	F2:3	231	5	Guo et al.[93]
HKW	Zheng58 x Chang7-2	F2:3	231	4
EL	Zheng58 x Chang7-2	F2:3	231	9
ERN	Zheng58 x Chang7-2	F2:3	231	10
KNR	Zheng58 x Chang7-2	F2:3	231	5
CD	Zheng58 x Chang7-2	F2:3	231	14
ED	Zheng58 x Chang7-2	F2:3	231	9
HKW	8984 × GY220	F2:3	284	5	Li et al. [94]
EL	8984 × GY220	F2:3	284	4
KNR	8984 × GY220	F2:3	284	1
ED	8984 × GY220	F2:3	284	3
ERN	8984 × GY220	F2:3	284	3
HKW	8622 × GY220	F2:3	265	1
EL	8622 × GY220	F2:3	265	4
KNR	8622 × GY220	F2:3	265	1
ED	8622 × GY220	F2:3	265	2
ERN	8622 × GY220	F2:3	265	3
HKW	5003 × 178	F2:3	210	5	Li et al. [95]
EL	5003 × 178	F2:3	210	6
ERN	5003 × 178	F2:3	210	6
KNR	5003 × 178	F2:3	210	5
ED	5003 × 178	F2:3	210	6
HKW	178 × P53	RIL	498	20	Pan et al. [96]
EW	178 × P53	RIL	498	18
EL	Ye107×082	F2:3	180	7	Zhang et al. [97]
EW	Ye107×082	F2:3	180	4
KNR	Ye107×082	F2:3	180	5
ED	Ye107×082	F2:3	180	4
ERN	Ye107×082	F2:3	180	7
HKW	Dan232×N04	BC2F2	220	3	Li et al.[98]
EL	Dan232×N05	BC2F2	220	3
ED	Dan232×N06	BC2F2	220	4
ERN	Dan232×N07	BC2F2	220	2
HKW	Dan232×N04	F2:3	259	3
EL	Dan232×N04	F2:3	259	3
ED	Dan232×N04	F2:3	259	4
ERN	Dan232×N04	F2:3	259	4
KNR	Dan232×N04	F2:3	259	1
HKW	Dan232×N04	RIL	258	13	Li et al. [99]
EL	Dan232×N04	RIL	258	8
KNR	Dan232×N04	RIL	258	8
ED	Dan232×N04	RIL	258	13
ERN	Dan232×N04	RIL	258	9
HKW	V671 × Mc	F2:3	270	19	Liu et al. [100]
ERN	V54×Lian87	F2:3	243	12	Han et al. [101]
ERN	B73 × SICAU1212	RIL	325	19	Yang et al. [102]
HKW	178×K12	RIL	150	16	Lan et al.[103]
ERN	Ye478 × Dan340	F2	500	13	Lu et al. [104]
HKW	UH007 × UH006	DH	148	4	Stange et al. [105]
ERN	MT-6×B73	F2:3	266	8	Cai et al. [106]
HKW	PH6WC × PH4CV	DH	240	5	Shi et al. [107]
HKW	B73 × SICAU1212	RIL	253	4	Yang et al. [108]
HKW	Ye107×082	F2:3	180	5	Jiang et al. [109]
ERN	B73 × abe2	RIL	241	2	Liu et al. [110]
ERN	KSS22×02S6140	F2:3	158	1	Park et al. [111]
EL	KSS22×02S6140	F2:3	158	2
EL	HF1 × 11S6169	DH	121	2	Choi et al.[112]
HKW	HF1 × 11S6169	DH	121	1
ED	Zheng58×Chang7-2	DH	161	4	Yang et al. [113]
EL	Zheng58×Chang7-2	DH	161	5
ERN	Zheng58×Chang7-2	DH	161	8
HKW	Zheng58×Chang7-2	DH	161	6
KNR	Zheng58×Chang7-2	DH	161	5
ERN	Mo17×Huangzao4	F2	191	13	Lan et al. [114]
KNR	Mo17×Huangzao4	F2	191	9
HKW	Mo17×Huangzao4	F2	191	8
ERN	Zong3×87-1	F2:3	266	6	Yan et al. [115]
KNR	Zong3×87-1	F2:3	266	5
HKW	Zong3×87-1	F2:3	266	4
ED	Huang C × Xu178	F2:3	203	7	Liu et al. [116]
EL	Huang C × Xu178	F2:3	203	6
ERN	Huang C × Xu178	F2:3	203	9
HKW	Huang C × Xu178	F2:3	203	10
KNR	Huang C × Xu178	F2:3	203	6
CD	Ji846×Ye3189	RIL	280	9	Jin et al. [117]
ED	Ji846×Ye3189	RIL	280	11
EL	Ji846×Ye3189	RIL	280	17
ERN	Ji846×Ye3189	RIL	280	11
EW	Ji846×Ye3189	RIL	280	7
HKW	Ji846×Ye3189	RIL	280	8
KNR	Ji846×Ye3189	RIL	280	6
HKW	Yu 82×Shen 137	F2:3	229	4	Zhang et al.[118]
EW	178 × 9782	RIL	262	3	Ren et al. [119]
HKW	178 × 9782	RIL	262	5
EL	178 × 9782	RIL	262	4
CD	178 × 9782	RIL	262	2
ERN	178 × 9782	RIL	262	2
KNR	178 × 9782	RIL	262	2
ED	178 × 9782	RIL	262	1
ED	Xu178 × K12	RIL	150	2	He et al. [120]
EL	Xu178 × K12	RIL	150	3
ERN	Xu178 × K12	RIL	150	4
KNR	Xu178 × K12	RIL	150	2
ERN	P2×P13	F2:3	152	4	Zhang et al. [121]
KNR	P2×P13	F2:3	152	5
HKW	P2×P13	F2:3	152	5
ERN	X178×Nong531	RIL	283	14	Zhao et al. [122]
CD	Huang C × Xu178	RIL	166	5	Chen et al. [123]
ED	Huang C × Xu179	RIL	166	2
EL	Huang C × Xu180	RIL	166	2
ERN	Huang C × Xu181	RIL	166	1
KNR	Huang C × Xu182	RIL	166	2
CD	Huang C × Xu183	IF2	238	3
ED	Huang C × Xu184	IF2	238	6
EL	Huang C × Xu185	IF2	238	4
ERN	Huang C × Xu186	IF2	238	4
KNR	Huang C × Xu187	IF2	238	2
EW	Lang huang×TS141	F2	202	5	Zhao et al. [124]
HKW	Lang huang×TS142	F2	202	4
EL	Lang huang×TS143	F2	202	3
EW	Chang 7-2×TS141	F2	218	4
HKW	Chang 7-2×TS142	F2	218	3
EL	Chang 7-2×TS143	F2	218	4
References
[86]	Liu, X.; Zheng, Z.; Tan, Z.; Li, Z.; He, C. Quantitative trait locus ( QTL ) mapping for 100-kernel weight of maize ( Zea mays L . ) under different nitrogen regimes. African Journal of Biotechnology. 2012, 9, 8283-8289. https://doi.org/10.5897/AJB10.525.
[87]	Zhang, H.; Zheng, Z.; Liu, X.; Li, Z.; He, C.; Liu, D.; Luo, Y.; Zhang, G.; Tan, Z.; Li, R. QTL mapping for ear length and ear diameter under different nitrogen regimes in maize. African Journal of Agricultural Research. 2010, 5, 626-630. https://doi.org/10.5897/AJAR10.350.
[88]	Chen, J.; Zhang, L.; Liu, S.; Li, Z.; Huang, R.; Li, Y.; Cheng, H.; Li, X.; Zhou, B.; Wu, S.; et al. The Genetic Basis of Natural Variation in Kernel Size and Related Traits Using a Four-Way Cross Population in Maize. PLoS One. 2016, 11, e0153428. https://doi.org/10.1371/journal.pone.0153428.
[89]	Zhao, X.; Peng, Y.; Zhang, J.; Fang, P.; Wu, B. Identification of QTLs and Meta‐QTLs for Seven Agronomic Traits in Multiple Maize Populations under Well‐Watered and Water‐Stressed Conditions. Crop Science. 2018, 58, 507-520. https://doi.org/10.2135/cropsci2016.12.0991.
[90]	Mei, X.; Dong, E.; Liang, Q.; Bai, Y.; Nan, J.; Yang, Y.; Cai, Y. Identification of QTL for fasciated ear related traits in maize. Crop Science. 2021, 61, 1184-1193. https://doi.org/10.1002/csc2.20435.
[91]	Liu, X.H.; Zheng, Z.P.; Tan, Z.B.; Li, Z.; He, C. Genetic analysis of two new quantitative trait loci for ear weight in maize inbred line Huangzao4. Genetics and Molecular Research. 2010, 9, 2140-2147. https://doi.org/10.4238/vol9-4gmr858.
[92]	Yang, C.; Liu, J.; Rong, T.Z. Detection of quantitative trait loci for ear row number in F2 populations of maize. Genetics and Molecular Research. 2015, 14, 14229-14238. https://doi.org/10.4238/2015.November.13.6.
[93]	Guo, J.J.; Chen, Z.L.; Liu, Z.P.; Wang, B.B.; Song, W.B.; Li, W.; Chen, J.; Dai, J.R.; Lai, J.S. Identification of genetic factors affecting plant density response through QTL mapping of yield component traits in maize (Zea mays L.). Euphytica. 2011, 182, 409-422. https://doi.org/10.1007/s10681-011-0517-8.
[94]	Li, Y.L.; Li, X.H.; Li, J.Z.; Fu, J.F.; Wang, Y.Z.; Wei, M.G. Dent corn genetic background influences QTL detection for grain yield and yield components in high-oil maize. Euphytica. 2009, 169, 273-284. https://doi.org/10.1007/s10681-009-9966-8.
[95]	Li, M.; Guo, X.; Zhang, M.; Wang, X.; Zhang, G.; Tian, Y.; Wang, Z. Mapping QTLs for grain yield and yield components under high and low phosphorus treatments in maize (Zea mays L.). Plant Science. 2010, 178, 454-462. https://doi.org/10.1016/j.plantsci.2010.02.019.
[96]	Pan, L.; Yin, Z.; Huang, Y.; Chen, J.; Zhu, L.; Zhao, Y.; Guo, J.; Lübberstedt, T. QTL for maize grain yield identified by QTL mapping in six environments and consensus loci for grain weight detected by meta-analysis. Plant Breeding. 2017, 136, 820-833. https://doi.org/10.1111/pbr.12524.
[97]	Zhang, Z.; Shen, T.; Jiang, T.; Hu, X.; Wen, M.; Qiu, H. Quantitative trait loci mapping of maize (Zea mays) ear traits under low‐phosphorus stress. Plant Breeding. 2022, 142, 12-23. https://doi.org/10.1111/pbr.13072.
[98]	Li, Y.L.; Niu, S.Z.; Dong, Y.B.; Cui, D.Q.; Wang, Y.Z.; Liu, Y.Y.; Wei, M.G. Identification of trait-improving quantitative trait loci for grain yield components from a dent corn inbred line in an advanced backcross BC2F2 population and comparison with its F2:3 population in popcorn. Theoretical and Applied Genetics. 2007, 115, 129-140. https://doi.org/10.1007/s00122-007-0549-6.
[99]	Li, J.Z.; Zhang, Z.W.; Li, Y.L.; Wang, Q.L.; Zhou, Y.G. QTL consistency and meta-analysis for grain yield components in three generations in maize. Theoretical and Applied Genetics. 2011, 122, 771-782. https://doi.org/10.1007/s00122-010-1485-4.
[100]	Liu, Y.; Wang, L.; Sun, C.; Zhang, Z.; Zheng, Y.; Qiu, F. Genetic analysis and major QTL detection for maize kernel size and weight in multi-environments. Theoretical and Applied Genetics. 2014, 127, 1019-1037. https://doi.org/10.1007/s00122-014-2276-0.
[101]	Han, X.; Qin, Y.; Sandrine, A.M.N.; Qiu, F. Fine mapping of qKRN8, a QTL for maize kernel row number, and prediction of the candidate gene. Theoretical and Applied Genetics. 2020, 133, 3139-3150. https://doi.org/10.1007/s00122-020-03660-7.
[102]	Yang, C.; Tang, D.; Zhang, L.; Liu, J.; Rong, T. Identification of QTL for ear row number and two-ranked versus many-ranked ear in maize across four environments. Euphytica. 2015, 206, 33-47. https://doi.org/10.1007/s10681-015-1466-4.
[103]	Lan, T.R.; He, K.H.; Chang, L.G.; Cui, T.T.; Zhao, Z.X.; Xue, J.Q.; Liu, J.C. QTL mapping and genetic analysis for maize kernel size and weight in multi-environments. Euphytica. 2018, 214, 119. https://doi.org/10.1007/s10681-018-2189-0.
[104]	Lu, M.; Xie, C.-X.; Li, X.-H.; Hao, Z.-F.; Li, M.-S.; Weng, J.-F.; Zhang, D.-G.; Bai, L.; Zhang, S.-H. Mapping of quantitative trait loci for kernel row number in maize across seven environments. Molecular Breeding. 2011, 28, 143-152. https://doi.org/10.1007/s11032-010-9468-3.
[105]	Stange, M.; Schrag, T.A.; Utz, H.F.; Riedelsheimer, C.; Bauer, E.; Melchinger, A.E. High-density linkage mapping of yield components and epistatic interactions in maize with doubled haploid lines from four crosses. Molecular Breeding. 2013, 32, 533-546. https://doi.org/10.1007/s11032-013-9887-z.
[106]	Cai, L.; Li, K.; Yang, X.; Li, J. Identification of large-effect QTL for kernel row number has potential for maize yield improvement. Molecular Breeding. 2014, 34, 1087-1096. https://doi.org/10.1007/s11032-014-0101-8.
[107]	Shi, Z.; Song, W.; Xing, J.; Duan, M.; Wang, F.; Tian, H.; Xu, L.; Wang, S.; Su, A.; Li, C.; et al. Molecular mapping of quantitative trait loci for three kernel-related traits in maize using a double haploid population. Molecular Breeding. 2017, 37, 108. https://doi.org/10.1007/s11032-017-0706-9.
[108]	Yang, C.; Zhang, L.; Jia, A.; Rong, T. Identification of QTL for maize grain yield and kernel-related traits. Journal of Genetics. 2016, 95, 239-247. https://doi.org/10.1007/s12041-016-0628-z.
[109]	Jiang, T.; Zhang, C.; Zhang, Z.; Wen, M.; Qiu, H. QTL mapping of maize (Zea mays L.) kernel traits under low-phosphorus stress. Physiology and Molecular Biology of Plants. 2023, 29, 435-445. https://doi.org/10.1007/s12298-023-01300-0.
[110]	Liu, C.; Zhou, Q.; Dong, L.; Wang, H.; Liu, F.; Weng, J.; Li, X.; Xie, C. Genetic architecture of the maize kernel row number revealed by combining QTL mapping using a high-density genetic map and bulked segregant RNA sequencing. BMC Genomics. 2016, 17, 915. https://doi.org/10.1186/s12864-016-3240-y.
[111]	Park, K.J.; Sa, K.J.; Kim, B.W.; Koh, H.-J.; Lee, J.K. Genetic mapping and QTL analysis for yield and agronomic traits with an F2:3 population derived from a waxy corn × sweet corn cross. Genes & Genomics. 2014, 36, 179-189. https://doi.org/10.1007/s13258-013-0157-6.
[112]	Choi, J.-K.; Sa, K.J.; Park, D.H.; Lim, S.E.; Ryu, S.-H.; Park, J.Y.; Park, K.J.; Rhee, H.-I.; Lee, M.; Lee, J.K. Construction of genetic linkage map and identification of QTLs related to agronomic traits in DH population of maize (Zea mays L.) using SSR markers. Genes & Genomics. 2019, 41, 667-678. https://doi.org/10.1007/s13258-019-00813-x.
[113]	Yang, J.; Liu, Z.; Chen, Q.; Qu, Y.; Tang, J.; Lübberstedt, T.; Li, H. Mapping of QTL for Grain Yield Components Based on a DH Population in Maize. Scientific Reports. 2020, 10, 7086. https://doi.org/10.1038/s41598-020-63960-2.
[114]	Lan, J.H.; Li, X.H.; Gao, S.R.; Zhang, B.S.; Zhang, S.H. QTL Analysis of Yield Components in Maize under Different Environments. Acta Agronomica Sinica. 2005, 31, 1253-1259. https://doi.org/10.3321/j.issn:0496-3490.2005.10.002
[115]	Yan, J.B.; Tang, H.; Huang, Y.Q.; Zheng, Y.L.; Chander, S.; Li, J.S. Genome wide scanning analysis of QTLs for major effects and epistasis in maize yield and component factors. Chinese Science Bulletin. 2006, 51, 1413-1421. https://doi.org/10.3321/j.issn:0023-074X.2006.12.009
[116]	Liu, Z.H.; Tang, J.H.; Wei, X.Y.; Wang, C.L.; Tian, G.W.; Hu, Y.M.; Chen, W.C. QTL Mapping of Ear Traits under Low and High Nitrogen Conditions in Maize. Scientia Agricultura Sinica. 2007, 40, 2409-2417. https://doi.org/10.3321/j.issn:0578-1752.2007.11.004
[117]	Jin, X.C.; Li, T.F.; Wu, F.Y.; Wang, X.; Zhang, L.; Di, H.; Wang, Z.H. QTL Mapping for Yield and Related Characters. Journal of Maize Sciences. 2011, 19, 10-18. https://doi.org/10.13597/j.cnki.maize.science.2011.05.022
[118]	Zhang, W.Q.; Ku, L.X.; Zhang, J.; Han, Z.P.; Chen, Y.H. QTL Analysis of Kernel Ratio; Kernel Depth; and 100-Kernel Weight in Maize (Zea mays L.). Acta Agronomica Sinica. 2013, 39, 455-463. https://doi.org/10.3724/SP.J.1006.2013.00455
[119]	Ren, Z.Y.; Su, S.Z.; Zhang, S.Z.; Liu, H.L.; Luo, B.W.; Liu, D.; Wu, L.; Rong, T.Z.; Gao, S.B. Characterization and QTL Mapping of Yield Trait under Two Phosphorus Regimes in Maize. Acta Agriculturae Boreali-Sinica. 2015, 30, 9-14. https://doi.org/10.7668/hbnxb.2015.01.002
[120]	He, K.H.; Chang, L.G.; Li, Y.N.; Qu, J.Z.; Cui, T.T.; Xu, S.T.; Xue, J.Q.; Liu, J.C. QTL mapping of ear traits of maize with and without N input. Journal of Plant Nutrition and Fertilizer. 2017, 23, 91–100. https://doi.org/10.11674/zwyf.16159
[121]	Zhang, Y.N.; Zhang, Q.; Pan, F.F.; Cai, X.Y.; Zhang, N.; Li, X.; Huang, X.Q. Detection of Quantitative Trait Loci for Maize Grain Yield and Kernel-related Traits. Journal of Fudan University (Natural Science). 2017, 56, 421-430. https://doi.org/10.15943/j.cnki.fdxb-jns.2017.04.014
[122]	Zhao, P.B.; Jia, X.Y.; Ma, J.R.; Zhu, L.Y.; Zhao, Y.F. Mapping and Analysis of QTLs Related to Ear Row Number in Maize Based on RIL Population. Seed. 2022, 41, 54-58. https://doi.org/10.16590/j.cnki.1001-4705.2022.12.054
[123]	Chen, H.; Xue, Y.D.; Yang, T.X.; Yan, P.S.; Meng, S.J.; Wang, L.L.; Zhang, Z.H. Identification QTL and heterotic loci for maize ear-related traits using a set of "immortalized F2 " population of Nongda 108. Journal of Henan Agricultural University. 2018, 52, 169-178. https://doi.org/10.16445/j.cnki.1000-2340.2018.02.00
[124]	Zhao, X.Q.; Fang, P.; Peng, Y.L.; Gao, Q.H.; Zeng, W.J.; Ren, B. QTL Mapping for Six Ear-related Traits Based on Two Maize (Zea mays) Related Populations. Journal of Agricultural Biotechnology. 2018, 26, 729-742. https://doi.org/10.3969/j.issn.1674-7968.2018.05.001
